# Supplementary material for: Comparison of new and emerging SARS-CoV-2 variant transmissibility through active contact testing. A comparative cross-sectional household seroprevalence study
Source: PubMed Central journal article supplement (PMC10124829; doi:10.1371/journal.pone.0284372), 2023-04-24

## Contents

|                                                                                                                                                                                           |    |
|-------------------------------------------------------------------------------------------------------------------------------------------------------------------------------------------|----|
| 1. Summary of IMD_rank at household-level, by VOC exposure.....                                                                                                                           | 2  |
| 2. Summary of potential confounders by (i) VOC status and (ii) nc_pos.....                                                                                                                | 3  |
| 3. Summary of VOC and nc_pos - unadjusted .....                                                                                                                                           | 11 |
| 4. Summary of VOC and nc_pos – adjusted (with continuous covariates grouped – diffpcrsero [3 levels]; dayshh [4 levels]; imd [4 levels]) .....                                            | 12 |
| 5. Summary of VOC and nc_pos – adjusted (with continuous covariates + age assessed using fractional polynomials); no adjustment for close_contact.....                                    | 13 |
| 6. Summary of VOC and nc_pos – adjusted (with continuous covariates + age assessed using fractional polynomials); plus adjustment for close_contact (assumed as factors) .....            | 14 |
| 7. Summary of VOC and nc_pos – adjusted (with continuous covariates + age assessed using fractional polynomials); adjustment for close_contact (assuming quantitative).....               | 15 |
| 8. Summary of VOC and nc_pos .....                                                                                                                                                        | 16 |
| 9. Summary of potential confounders with infection.....                                                                                                                                   | 17 |
| 10. Summary of VOC and infection - unadjusted.....                                                                                                                                        | 23 |
| 11. Summary of VOC and infection – adjusted (with continuous covariates + age assessed using fractional polynomials); plsu adjustment for close contact (as a factor) .....               | 24 |
| 12. Summary of VOC and infection – adjusted (with continuous covariates + age assessed using fractional polynomials); plus adjustment for close contact (as a quantitative variable)..... | 25 |
| 13. Summary of VOC and infection – adjusted (with continuous covariates + age assessed using fractional polynomials); no adjustment for close contact.....                                | 26 |
| 14. Summary of VOC and infection.....                                                                                                                                                     | 28 |

# 1. Summary of IMD\_rank at household-level, by VOC exposure

```
. table vocnew if n1==1, c(median imd_rank p25 imd_rank p75 imd_rank n imd_rank)
```

| vocnew  | med(imd_rank) | p25(imd_rank) | p75(imd_rank) | N(imd_rank) |
|---------|---------------|---------------|---------------|-------------|
| Non-VOC | 8899          | 4748          | 21971         | 55          |
| VOC     | 8860          | 5146          | 15029         | 221         |

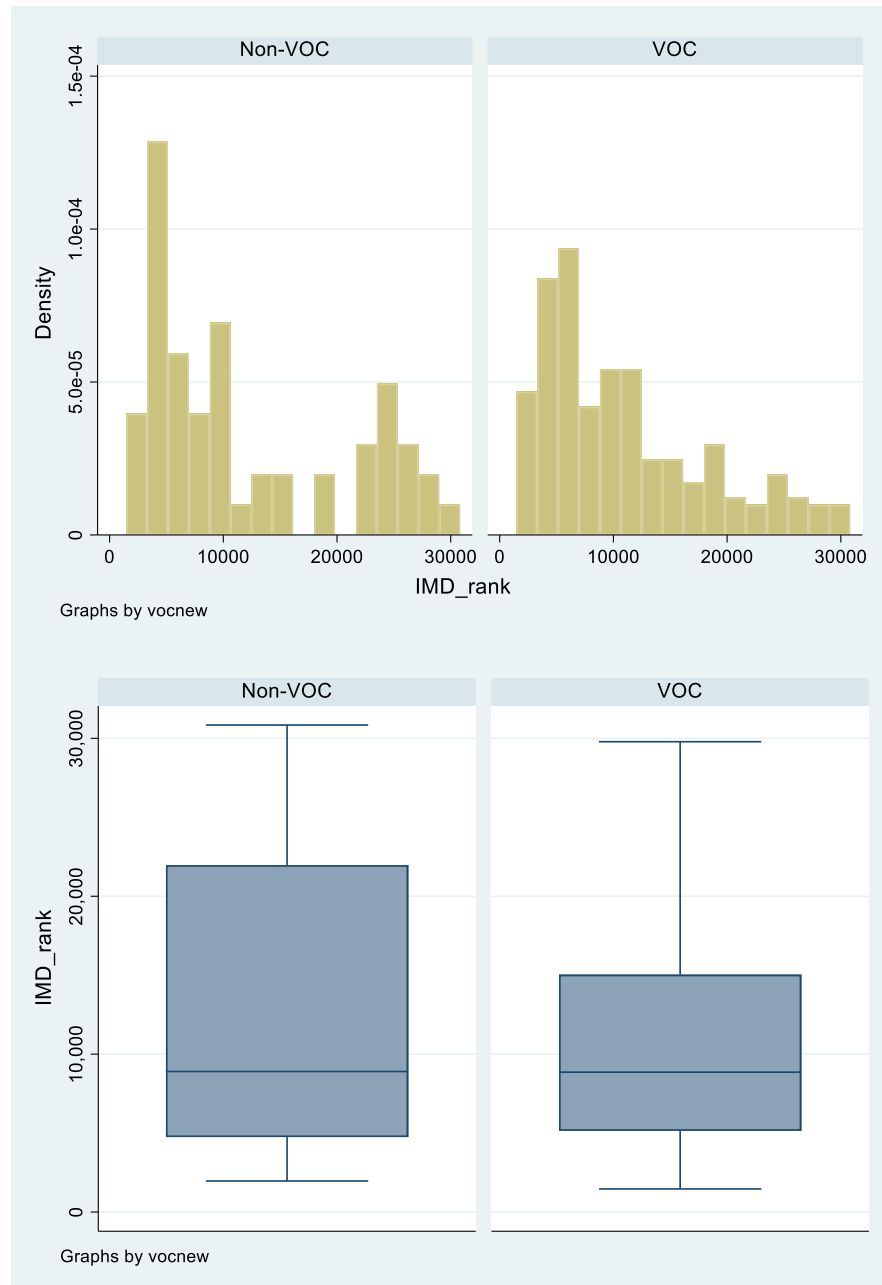

## 2. Summary of potential confounders by (i) VOC status and (ii) nc\_pos

```

-----
-----
name: <unnamed>
log: C:\Users\eidekfie\research\covid\UK\data\202206\datasummary-20220607.log
log type: text
opened on: 7 Jun 2022, 11:45:25

. xtset hh_id
panel variable: hh_id (unbalanced)

. * data summaries
. * note cont vars: agenew, dayshh, diffpcrsero
. foreach var in sexnew imdnew isolatenew close_contact diffpcrsero_cat3 dayshh_cat {
2.
.     tab `var' vocnew, col nokey
3.     tab `var' nc_pos, row nokey
4.     xtlogit nc_pos 1.`var', re or nolog
5.     quadchk, nooutput
6. }

-----
sexnew |          vocnew          |      Total
-----+-----+-----
      | Non-VOC      VOC |
-----+-----+-----
male  |          45      148 |          193
      |      44.12     42.05 |          42.51
-----+-----+-----
female |          57      204 |          261
      |      55.88     57.95 |          57.49
-----+-----+-----
Total |          102     352 |          454
      |      100.00    100.00 |          100.00
-----

sexnew |          NC_pos          |      Total
-----+-----+-----
      |      Neg      Pos |
-----+-----+-----
male  |          43      150 |          193
      |      22.28     77.72 |          100.00
-----+-----+-----
female |          59      202 |          261
      |      22.61     77.39 |          100.00
-----+-----+-----
Total |          102     352 |          454
      |      22.47     77.53 |          100.00
-----

Random-effects logistic regression
Group variable: hh_id
Number of obs      =          454
Number of groups   =          276

Random effects u_i ~ Gaussian
Obs per group:
min =          1
avg  =          1.6
max  =          7

Integration method: mvaghermite
Integration pts.   =          12

Log likelihood = -235.48501
Wald chi2(1)      =          0.07
Prob > chi2       =          0.7859

-----
nc_pos | Odds Ratio  Std. Err.    z    P>|z|    [95% Conf. Interval]
-----+-----+-----+-----+-----+-----
sexnew |
female |      .922787  .2729933   -0.27  0.786    .5167562    1.647848
_cons  |      5.847051  1.841601    5.61  0.000    3.153846    10.8401
-----+-----+-----+-----+-----+-----
/lnsig2u |      .8131777  .5141728
-----+-----+-----+-----+-----+-----
sigma_u |      1.501687  .3860632
rho     |      .406689  .1240663
-----+-----+-----+-----+-----+-----
Note: Estimates are transformed only in the first equation.
Note: _cons estimates baseline odds (conditional on zero random effects).
LR test of rho=0: chibar2(01) = 12.76
Prob >= chibar2 = 0.000

```

Refitting model intpoints() = 8  
 Refitting model intpoints() = 16

Quadrature check

|                | Fitted quadrature<br>12 points | Comparison quadrature<br>8 points | Comparison quadrature<br>16 points |                     |
|----------------|--------------------------------|-----------------------------------|------------------------------------|---------------------|
| Log likelihood | -235.48501                     | -235.49215                        | -235.48515                         |                     |
|                |                                | -.00713367                        | -.0001428                          | Difference          |
|                |                                | .00003029                         | 6.064e-07                          | Relative difference |
| nc_pos:        | -.0803568                      | -.08055042                        | -.08034954                         |                     |
| l.sexnew       |                                | -.00019362                        | 7.261e-06                          | Difference          |
|                |                                | .00240952                         | -.00009036                         | Relative difference |
| nc_pos:        | 1.7659374                      | 1.7674262                         | 1.7657873                          |                     |
| _cons          |                                | .0014888                          | -.00015006                         | Difference          |
|                |                                | .00084307                         | -.00008498                         | Relative difference |
| /:             | .81317773                      | .81656234                         | .81289198                          |                     |
| lnsig2u        |                                | .00338462                         | -.00028575                         | Difference          |
|                |                                | .00416221                         | -.0003514                          | Relative difference |

| imdnew | vocnew  |        | Total  |
|--------|---------|--------|--------|
|        | Non-VOC | VOC    |        |
| 1st    | 29      | 43     | 72     |
|        | 28.43   | 12.22  | 15.86  |
| 2nd    | 3       | 34     | 37     |
|        | 2.94    | 9.66   | 8.15   |
| 3rd    | 44      | 194    | 238    |
|        | 43.14   | 55.11  | 52.42  |
| 4th    | 26      | 81     | 107    |
|        | 25.49   | 23.01  | 23.57  |
| Total  | 102     | 352    | 454    |
|        | 100.00  | 100.00 | 100.00 |

| imdnew | NC_pos |       | Total  |
|--------|--------|-------|--------|
|        | Neg    | Pos   |        |
| 1st    | 21     | 51    | 72     |
|        | 29.17  | 70.83 | 100.00 |
| 2nd    | 4      | 33    | 37     |
|        | 10.81  | 89.19 | 100.00 |
| 3rd    | 51     | 187   | 238    |
|        | 21.43  | 78.57 | 100.00 |
| 4th    | 26     | 81    | 107    |
|        | 24.30  | 75.70 | 100.00 |
| Total  | 102    | 352   | 454    |
|        | 22.47  | 77.53 | 100.00 |

Random-effects logistic regression  
 Group variable: hh\_id

Number of obs = 454  
 Number of groups = 276

Random effects u\_i ~ Gaussian

Obs per group:  
 min = 1  
 avg = 1.6  
 max = 7

Integration method: mvaghermite

Integration pts. = 12

Log likelihood = -233.38742

Wald chi2(3) = 3.88  
 Prob > chi2 = 0.2750

| nc_pos   | Odds Ratio | Std. Err. | z    | P> z  | [95% Conf. Interval] |          |
|----------|------------|-----------|------|-------|----------------------|----------|
| -----    |            |           |      |       |                      |          |
| imdnew   |            |           |      |       |                      |          |
| 2nd      | 4.341703   | 3.469031  | 1.84 | 0.066 | .9068767             | 20.78606 |
| 3rd      | 1.745245   | .8219964  | 1.18 | 0.237 | .6933421             | 4.393043 |
| 4th      | 1.303409   | .6799066  | 0.51 | 0.611 | .4688807             | 3.623257 |
| _cons    | 3.435517   | 1.479133  | 2.87 | 0.004 | 1.477455             | 7.988586 |
| -----    |            |           |      |       |                      |          |
| /lnsig2u | .7423675   | .5314732  |      |       | -.2993009            | 1.784036 |
| -----    |            |           |      |       |                      |          |
| sigma_u  | 1.449449   | .3851718  |      |       | .8610089             | 2.440048 |
| rho      | .3897222   | .126405   |      |       | .1838995             | .6440964 |
| -----    |            |           |      |       |                      |          |

Note: Estimates are transformed only in the first equation.

Note: \_cons estimates baseline odds (conditional on zero random effects).

LR test of rho=0: chibar2(01) = 11.48                      Prob >= chibar2 = 0.000

Refitting model intpoints() = 8

Refitting model intpoints() = 16

#### Quadrature check

|                     | Fitted quadrature<br>12 points | Comparison quadrature<br>8 points | Comparison quadrature<br>16 points |                     |
|---------------------|--------------------------------|-----------------------------------|------------------------------------|---------------------|
| -----               |                                |                                   |                                    |                     |
| Log likelihood      | -233.38742                     | -233.39197                        | -233.38751                         |                     |
|                     |                                | -.00454226                        | -.00008313                         | Difference          |
|                     |                                | .00001946                         | 3.562e-07                          | Relative difference |
| -----               |                                |                                   |                                    |                     |
| nc_pos:<br>1.imdnew | 1.4682668                      | 1.4699117                         | 1.4683258                          |                     |
|                     |                                | .00164497                         | .00005902                          | Difference          |
|                     |                                | .00112035                         | .0000402                           | Relative difference |
| -----               |                                |                                   |                                    |                     |
| nc_pos:<br>2.imdnew | .55689522                      | .55750266                         | .55688111                          |                     |
|                     |                                | .00060744                         | -.0000141                          | Difference          |
|                     |                                | .00109076                         | -.00002532                         | Relative difference |
| -----               |                                |                                   |                                    |                     |
| nc_pos:<br>3.imdnew | .2649832                       | .26505685                         | .26497943                          |                     |
|                     |                                | .00007366                         | -3.767e-06                         | Difference          |
|                     |                                | .00027797                         | -.00001422                         | Relative difference |
| -----               |                                |                                   |                                    |                     |
| nc_pos:<br>_cons    | 1.2341673                      | 1.2348307                         | 1.2341097                          |                     |
|                     |                                | .00066342                         | -.00005758                         | Difference          |
|                     |                                | .00053755                         | -.00004665                         | Relative difference |
| -----               |                                |                                   |                                    |                     |
| /:<br>lnsig2u       | .74236747                      | .74531251                         | .74224271                          |                     |
|                     |                                | .00294504                         | -.00012476                         | Difference          |
|                     |                                | .00396709                         | -.00016806                         | Relative difference |
| -----               |                                |                                   |                                    |                     |

| isolatenew | vocnew  |        | Total  |
|------------|---------|--------|--------|
|            | Non-VOC | VOC    |        |
| no         | 60      | 263    | 323    |
|            | 58.82   | 74.72  | 71.15  |
| yes        | 42      | 89     | 131    |
|            | 41.18   | 25.28  | 28.85  |
| Total      | 102     | 352    | 454    |
|            | 100.00  | 100.00 | 100.00 |

| isolatenew | NC_pos |       | Total  |
|------------|--------|-------|--------|
|            | Neg    | Pos   |        |
| no         | 64     | 259   | 323    |
|            | 19.81  | 80.19 | 100.00 |
| yes        | 38     | 93    | 131    |
|            | 29.01  | 70.99 | 100.00 |
| Total      | 102    | 352   | 454    |
|            | 22.47  | 77.53 | 100.00 |

Random-effects logistic regression                      Number of obs       =       454

```

Group variable: hh_id                               Number of groups =      276
Random effects u_i ~ Gaussian                       Obs per group:
                                                    min =      1
                                                    avg =     1.6
                                                    max =      7
Integration method: mvaghermite                    Integration pts. =     12
Log likelihood = -233.47525                          Wald chi2(1) =      3.85
                                                    Prob > chi2 =     0.0498

```

| nc_pos     | Odds Ratio | Std. Err. | z     | P> z  | [95% Conf. Interval] |          |
|------------|------------|-----------|-------|-------|----------------------|----------|
| -----      |            |           |       |       |                      |          |
| isolateneu |            |           |       |       |                      |          |
| yes        | .4765333   | .1800673  | -1.96 | 0.050 | .227222              | .9993928 |
| _cons      | 6.907094   | 2.056209  | 6.49  | 0.000 | 3.853867             | 12.37924 |
| -----      |            |           |       |       |                      |          |
| /lnsig2u   | .7975741   | .5188084  |       |       | -.2192716            | 1.81442  |
| -----      |            |           |       |       |                      |          |
| sigma_u    | 1.490016   | .3865165  |       |       | .8961604             | 2.477401 |
| rho        | .4029295   | .1248135  |       |       | .1962153             | .6510306 |
| -----      |            |           |       |       |                      |          |

Note: Estimates are transformed only in the first equation.  
Note: \_cons estimates baseline odds (conditional on zero random effects).  
LR test of rho=0: chibar2(01) = 12.42                      Prob >= chibar2 = 0.000

Refitting model intpoints() = 8  
Refitting model intpoints() = 16

Quadrature check

|                      | Fitted quadrature 12 points | Comparison quadrature 8 points | Comparison quadrature 16 points |                     |
|----------------------|-----------------------------|--------------------------------|---------------------------------|---------------------|
| Log likelihood       | -233.47525                  | -233.4815                      | -233.47542                      |                     |
|                      |                             | -.00625457                     | -.0001701                       | Difference          |
|                      |                             | .00002679                      | 7.285e-07                       | Relative difference |
| -----                |                             |                                |                                 |                     |
| nc_pos: 1.isolateneu | -.74121762                  | -.74247132                     | -.74118178                      |                     |
|                      |                             | -.0012537                      | .00003584                       | Difference          |
|                      |                             | .00169141                      | -.00004836                      | Relative difference |
| -----                |                             |                                |                                 |                     |
| nc_pos: _cons        | 1.932549                    | 1.9344223                      | 1.932442                        |                     |
|                      |                             | .00187325                      | -.00010707                      | Difference          |
|                      |                             | .00096932                      | -.00005541                      | Relative difference |
| -----                |                             |                                |                                 |                     |
| /: ln sig2u          | .79757409                   | .80133424                      | .79738402                       |                     |
|                      |                             | .00376015                      | -.00019007                      | Difference          |
|                      |                             | .00471448                      | -.00023831                      | Relative difference |
| -----                |                             |                                |                                 |                     |

| close_cont act | vocnew  |        | Total  |
|----------------|---------|--------|--------|
|                | Non-VOC | VOC    |        |
| 0              | 19      | 49     | 68     |
|                | 18.63   | 13.92  | 14.98  |
| -----          |         |        |        |
| 1              | 43      | 114    | 157    |
|                | 42.16   | 32.39  | 34.58  |
| -----          |         |        |        |
| 2              | 15      | 58     | 73     |
|                | 14.71   | 16.48  | 16.08  |
| -----          |         |        |        |
| 3              | 25      | 131    | 156    |
|                | 24.51   | 37.22  | 34.36  |
| -----          |         |        |        |
| Total          | 102     | 352    | 454    |
|                | 100.00  | 100.00 | 100.00 |

| close_cont act | NC_pos |       | Total  |
|----------------|--------|-------|--------|
|                | Neg    | Pos   |        |
| 0              | 24     | 44    | 68     |
|                | 35.29  | 64.71 | 100.00 |

| 1     | 39    | 118   | 157    |
|-------|-------|-------|--------|
|       | 24.84 | 75.16 | 100.00 |
| 2     | 14    | 59    | 73     |
|       | 19.18 | 80.82 | 100.00 |
| 3     | 25    | 131   | 156    |
|       | 16.03 | 83.97 | 100.00 |
| Total | 102   | 352   | 454    |
|       | 22.47 | 77.53 | 100.00 |

```

Random-effects logistic regression      Number of obs   =      454
Group variable: hh_id                 Number of groups =      276

Random effects u_i ~ Gaussian          Obs per group:
                                         min =          1
                                         avg =          1.6
                                         max =          7

Integration method: mvaghermite        Integration pts. =      12

Log likelihood = -230.63371            Wald chi2(3)    =        8.58
                                         Prob > chi2     =       0.0354

```

|               | nc_pos   | Odds Ratio | Std. Err. | z    | P> z  | [95% Conf. Interval] |          |
|---------------|----------|------------|-----------|------|-------|----------------------|----------|
| close_contact |          |            |           |      |       |                      |          |
|               | 1        | 1.931561   | .9047636  | 1.41 | 0.160 | .7712526             | 4.837492 |
|               | 2        | 3.411578   | 1.947697  | 2.15 | 0.032 | 1.114288             | 10.44511 |
|               | 3        | 3.860246   | 1.932494  | 2.70 | 0.007 | 1.447076             | 10.29766 |
|               | _cons    | 2.334521   | .9437257  | 2.10 | 0.036 | 1.057064             | 5.15578  |
|               | /lnsig2u | .8614943   | .5371987  |      |       | -.1913958            | 1.914384 |
|               | sigma_u  | 1.538407   | .413215   |      |       | .9087385             | 2.604374 |
|               | rho      | .418398    | .1307225  |      |       | .200649              | .6733854 |

Note: Estimates are transformed only in the first equation.  
Note: \_cons estimates baseline odds (conditional on zero random effects).  
LR test of rho=0: chibar2(01) = 11.73                      Prob >= chibar2 = 0.000

Refitting model intpoints() = 8  
Refitting model intpoints() = 16

#### Quadrature check

|                | Fitted quadrature 12 points | Comparison quadrature 8 points | Comparison quadrature 16 points |                     |
|----------------|-----------------------------|--------------------------------|---------------------------------|---------------------|
| Log likelihood | -230.63371                  | -230.64074                     | -230.63395                      |                     |
|                |                             | -.00703513                     | -.00023769                      | Difference          |
|                |                             | .0000305                       | 1.031e-06                       | Relative difference |
| nc_pos:        | .65832848                   | .65941462                      | .65827697                       |                     |
| 1.close_co~t   |                             | .00108614                      | -.00005151                      | Difference          |
|                |                             | .00164985                      | -.00007824                      | Relative difference |
| nc_pos:        | 1.2271749                   | 1.2296356                      | 1.2270703                       |                     |
| 2.close_co~t   |                             | .00246073                      | -.00010455                      | Difference          |
|                |                             | .0020052                       | -.0000852                       | Relative difference |
| nc_pos:        | 1.350731                    | 1.3529793                      | 1.350674                        |                     |
| 3.close_co~t   |                             | .00224837                      | -.00005701                      | Difference          |
|                |                             | .00166456                      | -.0000422                       | Relative difference |
| nc_pos:        | .84780661                   | .8483896                       | .8477465                        |                     |
| _cons          |                             | .00058299                      | -.00006011                      | Difference          |
|                |                             | .00068765                      | -.0000709                       | Relative difference |
| /:             | .86149431                   | .86668334                      | .86127062                       |                     |
| lnsig2u        |                             | .00518903                      | -.00022369                      | Difference          |
|                |                             | .00602328                      | -.00025966                      | Relative difference |

```

-----
RECODE of |
diffpcrser |          vocnew
o |      Non-VOC      VOC |      Total
-----+-----+-----+-----
<100 |          2        102 |         104
      |         1.96      28.98 |         22.91
-----+-----+-----+-----
100-150 |          58        148 |         206
      |         56.86      42.05 |         45.37
-----+-----+-----+-----
>150 |          42        102 |         144
      |         41.18      28.98 |         31.72
-----+-----+-----+-----
Total |          102        352 |         454
      |        100.00     100.00 |        100.00

```

```

RECODE of |
diffpcrser |          NC_pos
o |          Neg          Pos |      Total
-----+-----+-----+-----
<100 |          13          91 |         104
      |         12.50      87.50 |        100.00
-----+-----+-----+-----
100-150 |          47          159 |         206
      |         22.82      77.18 |        100.00
-----+-----+-----+-----
>150 |          42          102 |         144
      |         29.17      70.83 |        100.00
-----+-----+-----+-----
Total |          102          352 |         454
      |         22.47      77.53 |        100.00

```

```

Random-effects logistic regression      Number of obs      =      454
Group variable: hh_id                  Number of groups   =      276

Random effects u_i ~ Gaussian          Obs per group:
                                         min =              1
                                         avg =              1.6
                                         max =              7

Integration method: mvaghermite        Integration pts.   =      12

Log likelihood = -231.48092             Wald chi2(2)      =      7.05
                                         Prob > chi2       =      0.0295

```

```

-----
nc_pos | Odds Ratio  Std. Err.    z    P>|z|    [95% Conf. Interval]
-----+-----+-----+-----+-----+-----
diffpcrsero_cat3 |
100-150 | .3882039   .1874793   -1.96  0.050   .1506539   1.000321
>150 | .2607014   .1320531   -2.65  0.008   .0966016   .7035623
      |
_cons | 13.26599   6.569921    5.22  0.000   5.025576   35.01816
-----+-----+-----+-----+-----+-----
/lnsig2u | .6964202   .5368976
-----+-----+-----+-----+-----+-----
sigma_u | 1.41653    .3802657
rho | .3788512   .1263443
-----+-----+-----+-----+-----+-----

```

```

Note: Estimates are transformed only in the first equation.
Note: _cons estimates baseline odds (conditional on zero random effects).
LR test of rho=0: chibar2(01) = 10.51          Prob >= chibar2 = 0.001

```

```

Refitting model intpoints() = 8
Refitting model intpoints() = 16

```

Quadrature check

```

-----
Fitted      Comparison      Comparison
quadrature  quadrature      quadrature
12 points   8 points        16 points
-----+-----+-----+-----+-----
Log          -231.48092      -231.48372      -231.48096
likelihood   -.00279762      -.00003857      -0.00003857   Difference
                                         .00001209      1.666e-07     Relative difference

```



```

-----
nc_pos:      -.94622459      -.94749653      -.94629708
2.diffpcrs~3      -.00127194      -.00007249      Difference
                  .00134423      .00007661      Relative difference
-----
nc_pos:      -1.3443796      -1.3460817      -1.3444416
3.diffpcrs~3      -.00170211      -.00006202      Difference
                  .0012661      .00004613      Relative difference
-----
nc_pos:      2.5852035      2.5874489      2.5852545
  _cons      .00224546      .000051      Difference
              .00086858      .00001973      Relative difference
-----
/:      .69642019      .6992171      .69641754
lnsig2u      .00279692      -2.647e-06      Difference
              .00401613      -3.802e-06      Relative difference
-----

```

| RECODE of<br>dayshh | vocnew  |        | Total  |
|---------------------|---------|--------|--------|
|                     | Non-VOC | VOC    |        |
| 0                   | 23      | 33     | 56     |
|                     | 22.55   | 9.38   | 12.33  |
| 1-3d                | 22      | 61     | 83     |
|                     | 21.57   | 17.33  | 18.28  |
| 4-7d                | 26      | 111    | 137    |
|                     | 25.49   | 31.53  | 30.18  |
| >7d                 | 31      | 147    | 178    |
|                     | 30.39   | 41.76  | 39.21  |
| Total               | 102     | 352    | 454    |
|                     | 100.00  | 100.00 | 100.00 |

| RECODE of<br>dayshh | NC_pos |       | Total  |
|---------------------|--------|-------|--------|
|                     | Neg    | Pos   |        |
| 0                   | 19     | 37    | 56     |
|                     | 33.93  | 66.07 | 100.00 |
| 1-3d                | 24     | 59    | 83     |
|                     | 28.92  | 71.08 | 100.00 |
| 4-7d                | 29     | 108   | 137    |
|                     | 21.17  | 78.83 | 100.00 |
| >7d                 | 30     | 148   | 178    |
|                     | 16.85  | 83.15 | 100.00 |
| Total               | 102    | 352   | 454    |
|                     | 22.47  | 77.53 | 100.00 |

```

Random-effects logistic regression      Number of obs      =      454
Group variable: hh_id                  Number of groups   =      276

Random effects u_i ~ Gaussian          Obs per group:
                                         min =      1
                                         avg  =      1.6
                                         max  =      7

Integration method: mvaghermite        Integration pts.   =      12

Log likelihood = -231.10402             Wald chi2(3)      =      7.55
                                         Prob > chi2       =      0.0563

```

| nc_pos     | Odds Ratio | Std. Err. | z    | P> z  | [95% Conf. Interval] |          |
|------------|------------|-----------|------|-------|----------------------|----------|
| dayshh_cat |            |           |      |       |                      |          |
| 1-3d       | 1.323575   | .7179555  | 0.52 | 0.605 | .4571155             | 3.832405 |
| 4-7d       | 2.507044   | 1.34648   | 1.71 | 0.087 | .8749831             | 7.183302 |
| >7d        | 3.773342   | 2.076606  | 2.41 | 0.016 | 1.283155             | 11.09617 |
| _cons      | 2.460671   | 1.10357   | 2.01 | 0.045 | 1.021654             | 5.926566 |

```

/lnsig2u | .8381753 .5306845 -.2019473 1.878298
-----+-----
sigma_u | 1.520574 .4034724 .9039568 2.557804
rho | .4127346 .1286298 .198962 .6653995
-----+-----

```

Note: Estimates are transformed only in the first equation.  
Note: \_cons estimates baseline odds (conditional on zero random effects).  
LR test of rho=0: chibar2(01) = 12.27 Prob >= chibar2 = 0.000

Refitting model intpoints() = 8  
Refitting model intpoints() = 16

Quadrature check

|                         | Fitted<br>quadrature<br>12 points | Comparison<br>quadrature<br>8 points | Comparison<br>quadrature<br>16 points |                     |
|-------------------------|-----------------------------------|--------------------------------------|---------------------------------------|---------------------|
| Log likelihood          | -231.10402                        | -231.11028                           | -231.10422                            |                     |
|                         |                                   | -.00625626                           | -.00019967                            | Difference          |
|                         |                                   | .00002707                            | 8.640e-07                             | Relative difference |
| nc_pos:<br>1.dayshh_cat | .28033671                         | .28051364                            | .28033181                             |                     |
|                         |                                   | .00017693                            | -4.897e-06                            | Difference          |
|                         |                                   | .00063115                            | -.00001747                            | Relative difference |
| nc_pos:<br>2.dayshh_cat | .91910423                         | .92072542                            | .91905128                             |                     |
|                         |                                   | .00162119                            | -.00005296                            | Difference          |
|                         |                                   | .00176388                            | -.00005762                            | Relative difference |
| nc_pos:<br>3.dayshh_cat | 1.3279611                         | 1.3304537                            | 1.327941                              |                     |
|                         |                                   | .00249265                            | -.00002002                            | Difference          |
|                         |                                   | .00187705                            | -.00001508                            | Relative difference |
| nc_pos:<br>_cons        | .90043412                         | .9009076                             | .90038752                             |                     |
|                         |                                   | .00047348                            | -.0000466                             | Difference          |
|                         |                                   | .00052583                            | -.00005175                            | Relative difference |
| /:<br>lnsig2u           | .83817526                         | .84286857                            | .83803938                             |                     |
|                         |                                   | .00469331                            | -.00013589                            | Difference          |
|                         |                                   | .00559943                            | -.00016212                            | Relative difference |

### 3. Summary of VOC and nc\_pos - unadjusted

```
. tab vocnew nc_pos, row
```

| vocnew  | NC_pos       |              | Total         |
|---------|--------------|--------------|---------------|
|         | Neg          | Pos          |               |
| Non-VOC | 39<br>38.24  | 63<br>61.76  | 102<br>100.00 |
| VOC     | 63<br>17.90  | 289<br>82.10 | 352<br>100.00 |
| Total   | 102<br>22.47 | 352<br>77.53 | 454<br>100.00 |

```
. xtlogit nc_pos i.vocnew, re or nolog/* Random effects logistic. [3.54] NB: rho is large (0.33) so numerical approx should be checked*/
```

```
Random-effects logistic regression      Number of obs   =      454
Group variable: hh_id                  Number of groups =      276
```

```
Random effects u_i ~ Gaussian          Obs per group:
                                         min =      1
                                         avg =     1.6
                                         max =      7
```

```
Integration method: mvaghermite        Integration pts. =      12
```

```
Log likelihood = -229.46051            Wald chi2(1)    =     11.41
                                         Prob > chi2     =     0.0007
```

| nc_pos   | Odds Ratio | Std. Err. | z    | P> z  | [95% Conf. Interval] |          |
|----------|------------|-----------|------|-------|----------------------|----------|
| vocnew   |            |           |      |       |                      |          |
| VOC      | 3.542754   | 1.32668   | 3.38 | 0.001 | 1.700536             | 7.380679 |
| _cons    | 1.943125   | .6121677  | 2.11 | 0.035 | 1.047938             | 3.603012 |
| /lnsig2u | .4897778   | .5991911  |      |       | -.684615             | 1.664171 |
| sigma_u  | 1.277479   | .3827271  |      |       | .7101298             | 2.298106 |
| rho      | .3315751   | .1328005  |      |       | .1329109             | .61617   |

```
Note: Estimates are transformed only in the first equation.
Note: _cons estimates baseline odds (conditional on zero random effects).
LR test of rho=0: chibar2(01) = 7.55          Prob >= chibar2 = 0.003
```

```
. quadchk, nooutput
```

```
Refitting model intpoints() = 8
Refitting model intpoints() = 16
```

#### Quadrature check

|                     | Fitted quadrature<br>12 points | Comparison quadrature<br>8 points     | Comparison quadrature<br>16 points    |                                   |
|---------------------|--------------------------------|---------------------------------------|---------------------------------------|-----------------------------------|
| Log likelihood      | -229.46051                     | -229.46195<br>-.00143828<br>6.268e-06 | -229.46057<br>-.00006136<br>2.674e-07 | Difference<br>Relative difference |
| nc_pos:<br>1.vocnew | 1.2649045                      | 1.2655141<br>.00060965<br>.00048197   | 1.264907<br>2.516e-06<br>1.989e-06    | Difference<br>Relative difference |
| nc_pos:<br>_cons    | .66429728                      | .66454057<br>.00024329<br>.00036624   | .66430144<br>4.165e-06<br>6.270e-06   | Difference<br>Relative difference |
| /:<br>lnsig2u       | .48977785                      | .49191591<br>.00213807<br>.00436538   | .48980178<br>.00002394<br>.00004887   | Difference<br>Relative difference |

#### 4. Summary of VOC and nc\_pos – adjusted (with continuous covariates grouped – diffpcrsero [3 levels]; dayshh [4 levels]; imd [4 levels])

```
. xtlogit nc_pos i.vocnew i.sexnew agenew i.diffpcrsero_cat3 i.dayshh_cat i.imdnew
i.close_contact, re or nolog
```

```
Random-effects logistic regression      Number of obs   =    454
Group variable: hh_id                  Number of groups =    276
```

```
Random effects u_i ~ Gaussian          Obs per group:
                                         min =    1
                                         avg =   1.6
                                         max =    7
```

```
Integration method: mvaghermite       Integration pts. =    12
```

```
Log likelihood = -220.37474            Wald chi2(14)   =    20.73
                                         Prob > chi2     =    0.1088
```

|                  | nc_pos  | Odds Ratio | Std. Err. | z     | P> z  | [95% Conf. Interval] |
|------------------|---------|------------|-----------|-------|-------|----------------------|
| vocnew           | VOC     | 2.394783   | .9624276  | 2.17  | 0.030 | 1.089384 5.26443     |
| sexnew           | female  | .8586828   | .25708    | -0.51 | 0.611 | .4775211 1.544091    |
| agenew           |         | 1.004246   | .0075533  | 0.56  | 0.573 | .9895503 1.01916     |
| diffpcrsero_cat3 | 100-150 | .5220589   | .2544353  | -1.33 | 0.182 | .2008493 1.356965    |
|                  | >150    | .3408856   | .174178   | -2.11 | 0.035 | .1252221 .9279754    |
| dayshh_cat       | 1-3d    | .9645288   | .5266307  | -0.07 | 0.947 | .3307965 2.812351    |
|                  | 4-7d    | 1.386087   | .7818336  | 0.58  | 0.563 | .4588419 4.187141    |
|                  | >7d     | 1.892842   | 1.070006  | 1.13  | 0.259 | .625084 5.731793     |
| imdnew           | 2nd     | 2.419628   | 1.946274  | 1.10  | 0.272 | .5001131 11.70655    |
|                  | 3rd     | 1.105704   | .541181   | 0.21  | 0.837 | .4236655 2.885725    |
|                  | 4th     | .9940233   | .5347686  | -0.01 | 0.991 | .346309 2.853181     |
| close_contact    | 1       | 1.538946   | .7458413  | 0.89  | 0.374 | .5952419 3.978811    |
|                  | 2       | 2.105478   | 1.263663  | 1.24  | 0.215 | .6493481 6.826903    |
|                  | 3       | 2.706174   | 1.459996  | 1.85  | 0.065 | .9399994 7.790832    |
| _cons            |         | 1.66391    | 1.344699  | 0.63  | 0.529 | .3413708 8.110235    |
| /lnsig2u         |         | .50901     | .6437654  |       |       | -.752747 1.770767    |
| sigma_u          |         | 1.289823   | .4151717  |       |       | .6863459 2.423914    |
| rho              |         | .3358513   | .1435952  |       |       | .1252535 .6410489    |

```
Note: Estimates are transformed only in the first equation.
Note: _cons estimates baseline odds (conditional on zero random effects).
LR test of rho=0: chibar2(01) = 6.10          Prob >= chibar2 = 0.007
```

## 5. Summary of VOC and nc\_pos – adjusted (with continuous covariates + age assessed using fractional polynomials); no adjustment for close\_contact

```
. * fractional polynomials for continuous terms for agenevm, diffpcrsero and dayshh
. mfp: xtlogit nc_pos vocnew agenev diffpcrsero dayshh imd_rank, re or nolog
```

Deviance for model with all terms untransformed = 451.141, 454 observations

[vocnew included with 1 df in model]

| Variable    | Type  | DF  | Initial | Final | Alpha | Status | Powers |
|-------------|-------|-----|---------|-------|-------|--------|--------|
| diffpcrsero | lin.  | FP2 | 451.141 | 0.281 | 0.964 | 1      | 0 3    |
|             | Final |     | 451.141 |       |       | 1      |        |
| dayshh      | lin.  | FP2 | 451.141 | 6.180 | 0.103 | 1      | 1 2    |
|             | Final |     | 451.141 |       |       | 1      |        |
| agenev      | lin.  | FP2 | 451.141 | 0.797 | 0.850 | 1      | 3 3    |
|             | Final |     | 451.141 |       |       | 1      |        |
| imd_rank    | lin.  | FP2 | 451.141 | 0.759 | 0.859 | 1      | -2 -1  |
|             | Final |     | 451.141 |       |       | 1      |        |

Fractional polynomial fitting algorithm converged after 1 cycle.

Transformations of covariates:

```
-> gen double Iagen__1 = agenev-41.10352423 if e(sample)
-> gen double Idiff__1 = diffpcrsero-130.7400881 if e(sample)
-> gen double Idays__1 = dayshh-8.372246696 if e(sample)
-> gen double Iimd__1 = imd_rank-11221.59251 if e(sample)
```

Final multivariable fractional polynomial model for nc\_pos

| Variable    | df | Select | Alpha  | Status | df | Powers |
|-------------|----|--------|--------|--------|----|--------|
| vocnew      | 1  | 1.0000 | 0.0500 | in     | 1  | 1      |
| agenev      | 4  | 1.0000 | 0.0500 | in     | 1  | 1      |
| diffpcrsero | 4  | 1.0000 | 0.0500 | in     | 1  | 1      |
| dayshh      | 4  | 1.0000 | 0.0500 | in     | 1  | 1      |
| imd_rank    | 4  | 1.0000 | 0.0500 | in     | 1  | 1      |

Random-effects logistic regression  
Group variable: hh\_id  
Number of obs = 454  
Number of groups = 276

Random effects u\_i ~ Gaussian  
Obs per group:  
min = 1  
avg = 1.6  
max = 7

Integration method: mvaghermite  
Integration pts. = 12

Log likelihood = -225.57054  
Wald chi2(5) = 16.47  
Prob > chi2 = 0.0056

| nc_pos   | Odds Ratio | Std. Err. | z     | P> z  | [95% Conf. Interval] |
|----------|------------|-----------|-------|-------|----------------------|
| vocnew   | 2.706961   | 1.058336  | 2.55  | 0.011 | 1.258025 5.824717    |
| Iagen__1 | 1.009618   | .0069873  | 1.38  | 0.167 | .9960159 1.023406    |
| Idiff__1 | .991264    | .004792   | -1.82 | 0.070 | .9819163 1.000701    |
| Idays__1 | 1.033742   | .0217829  | 1.57  | 0.115 | .9919178 1.07733     |
| Iimd__1  | .9999948   | .0000209  | -0.25 | 0.804 | .9999538 1.000036    |
| _cons    | 2.426699   | .821718   | 2.62  | 0.009 | 1.249643 4.712441    |
| /lnsig2u | .4524772   | .6260598  |       |       | -.7745774 1.679532   |
| sigma_u  | 1.253875   | .3925003  |       |       | .6788951 2.315825    |
| rho      | .3233606   | .136981   |       |       | .1228812 .6197964    |

Note: Estimates are transformed only in the first equation.  
 Note: \_cons estimates baseline odds (conditional on zero random effects).  
 LR test of rho=0: chibar2(01) = 6.77 Prob >= chibar2 = 0.005  
 Deviance: 451.141.

:

## 6. Summary of VOC and nc\_pos – adjusted (with continuous covariates + age assessed using fractional polynomials); plus adjustment for close\_contact (assumed as factors)

```
. mfp, df(agenew diffpcrsero dayshh imd_rank:4): xtlogit nc_pos vocnew sexnew agenew
diffpcrsero dayshh imd_rank close_contacta close_contactb close_contactc, re or nolog
```

Deviance for model with all terms untransformed = 445.167, 454 observations

[vocnew included with 1 df in model]

[close\_contactc included with 1 df in model]

```
diffpcrsero lin. FP2 445.167 0.180 0.981 1 2 3
             Final 445.167 1
```

[close\_contactb included with 1 df in model]

[close\_contacta included with 1 df in model]

```
dayshh lin. FP2 445.167 3.877 0.275 1 1 2
        Final 445.167 1
```

```
agenew lin. FP2 445.167 0.777 0.855 1 -2 2
        Final 445.167 1
```

[sexnew included with 1 df in model]

```
imd_rank lin. FP2 445.167 0.810 0.847 1 -2 -1
          Final 445.167 1
```

Fractional polynomial fitting algorithm converged after 1 cycle.

Transformations of covariates:

```
-> gen double Iagen__1 = agenew-41.10352423 if e(sample)
-> gen double Idiff__1 = diffpcrsero-130.7400881 if e(sample)
-> gen double Idayshh__1 = dayshh-8.372246696 if e(sample)
-> gen double Iimd__1 = imd_rank-11221.59251 if e(sample)
```

Final multivariable fractional polynomial model for nc\_pos

| Variable     | -----Initial----- |        |        | -----Final----- |    |        |
|--------------|-------------------|--------|--------|-----------------|----|--------|
|              | df                | Select | Alpha  | Status          | df | Powers |
| vocnew       | 1                 | 1.0000 | 0.0500 | in              | 1  | 1      |
| sexnew       | 1                 | 1.0000 | 0.0500 | in              | 1  | 1      |
| agenew       | 4                 | 1.0000 | 0.0500 | in              | 1  | 1      |
| diffpcrsero  | 4                 | 1.0000 | 0.0500 | in              | 1  | 1      |
| dayshh       | 4                 | 1.0000 | 0.0500 | in              | 1  | 1      |
| imd_rank     | 4                 | 1.0000 | 0.0500 | in              | 1  | 1      |
| close_con... | 1                 | 1.0000 | 0.0500 | in              | 1  | 1      |
| close_con... | 1                 | 1.0000 | 0.0500 | in              | 1  | 1      |
| close_con... | 1                 | 1.0000 | 0.0500 | in              | 1  | 1      |

```
Random-effects logistic regression          Number of obs    =    454
Group variable: hh_id                     Number of groups =    276
```

```
Random effects u_i ~ Gaussian              Obs per group:
                                          min =    1
                                          avg =    1.6
                                          max =    7
```

```

Integration method: mvaghermite           Integration pts. =          12
                                           Wald chi2(9)      =          19.34
Log likelihood = -222.58337                Prob > chi2       =          0.0224

```

| nc_pos         | Odds Ratio | Std. Err. | z     | P> z  | [95% Conf. Interval] |          |
|----------------|------------|-----------|-------|-------|----------------------|----------|
| vocnew         | 2.541672   | 1.012601  | 2.34  | 0.019 | 1.164129             | 5.549293 |
| sexnew         | .8790088   | .2592811  | -0.44 | 0.662 | .4930767             | 1.567011 |
| Iagen__1       | 1.004305   | .007453   | 0.58  | 0.563 | .9898034             | 1.01902  |
| Idiff__1       | .9902699   | .0049169  | -1.97 | 0.049 | .9806796             | .9999539 |
| Idays__1       | 1.021089   | .0220517  | 0.97  | 0.334 | .9787699             | 1.065237 |
| Iimd__1        | 1.000001   | .0000218  | 0.03  | 0.974 | .9999581             | 1.000043 |
| close_contacta | 1.805578   | .8254464  | 1.29  | 0.196 | .7370162             | 4.423392 |
| close_contactb | 2.513999   | 1.409449  | 1.64  | 0.100 | .8378131             | 7.543675 |
| close_contactc | 3.174559   | 1.607752  | 2.28  | 0.023 | 1.176504             | 8.565912 |
| _cons          | 1.320507   | .6578477  | 0.56  | 0.577 | .4973826             | 3.505829 |
| /lnsig2u       | .4770832   | .6460376  |       |       | -.7891273            | 1.743294 |
| sigma_u        | 1.269397   | .4100389  |       |       | .6739741             | 2.390845 |
| rho            | .3287676   | .1425672  |       |       | .1213215             | .6347029 |

```

Note: Estimates are transformed only in the first equation.
Note: _cons estimates baseline odds (conditional on zero random effects).
LR test of rho=0: chibar2(01) = 6.15          Prob >= chibar2 = 0.007
Deviance: 445.167.

```

## 7. Summary of VOC and nc\_pos – adjusted (with continuous covariates + age assessed using fractional polynomials); adjustment for close\_contact (assuming quantitative)

```

. mfp, df(agenew diffpcrsero dayshh imd_rank close_contact:4): xtlogit nc_pos vocnew sexnew
agenew diffpcrsero dayshh imd_rank close_contact, re or nolog

```

Deviance for model with all terms untransformed = 445.533, 454 observations

[vocnew included with 1 df in model]

```

close_con... lin.   FP2    445.533    0.366  0.947    1        -2  0
              Final    445.533                1
diffpcrsero lin.   FP2    445.533    0.198  0.978    1        1  3
              Final    445.533                1
dayshh       lin.   FP2    445.533    4.148  0.246    1        1  2
              Final    445.533                1
agenew       lin.   FP2    445.533    0.881  0.830    1        -1  1
              Final    445.533                1

```

[sexnew included with 1 df in model]

```

imd_rank     lin.   FP2    445.533    0.717  0.869    1        -2 -1
              Final    445.533                1

```

Fractional polynomial fitting algorithm converged after 1 cycle.

Transformations of covariates:

```

-> gen double Iagen__1 = agenew-41.10352423 if e(sample)
-> gen double Idiff__1 = diffpcrsero-130.7400881 if e(sample)
-> gen double Idays__1 = dayshh-8.372246696 if e(sample)
-> gen double Iimd__1 = imd_rank-11221.59251 if e(sample)
-> gen double Iclos__1 = close_contact-1.698237885 if e(sample)

```

Final multivariable fractional polynomial model for nc\_pos

```

-----
Variable | -----Initial-----          -----Final-----

```

```

-----+-----+-----+-----+-----+-----+-----
                |  df      Select  Alpha    Status    df    Powers
-----+-----+-----+-----+-----+-----+-----
    vocnew |      1      1.0000  0.0500    in      1      1
    sexnew |      1      1.0000  0.0500    in      1      1
    agenew |      4      1.0000  0.0500    in      1      1
diffpcrsero |      4      1.0000  0.0500    in      1      1
    dayshh |      4      1.0000  0.0500    in      1      1
    imd_rank |      4      1.0000  0.0500    in      1      1
close_con... |      4      1.0000  0.0500    in      1      1
-----+-----+-----+-----+-----+-----+-----

Random-effects logistic regression
Group variable: hh_id
                                Number of obs   =    454
                                Number of groups =    276

Random effects u_i ~ Gaussian
                                Obs per group:
                                    min =         1
                                    avg =         1.6
                                    max =         7

Integration method: mvaghermite
                                Integration pts. =     12

Log likelihood = -222.76656
                                Wald chi2(7)     =     19.48
                                Prob > chi2      =     0.0068
-----+-----+-----+-----+-----+-----+-----

```

| nc_pos                              | Odds Ratio | Std. Err. | z     | P> z  | [95% Conf. Interval] |          |
|-------------------------------------|------------|-----------|-------|-------|----------------------|----------|
| vocnew                              | 2.485695   | .9772936  | 2.32  | 0.021 | 1.150227             | 5.371707 |
| sexnew                              | .8820909   | .2581135  | -0.43 | 0.668 | .497094              | 1.565266 |
| Iagen__1                            | 1.00412    | .0072218  | 0.57  | 0.568 | .9900645             | 1.018374 |
| Idiff__1                            | .9901183   | .0048778  | -2.02 | 0.044 | .980604              | .9997249 |
| Idays__1                            | 1.022191   | .0219288  | 1.02  | 0.306 | .9801028             | 1.066087 |
| Iimd__1                             | .9999992   | .0000212  | -0.04 | 0.971 | .9999577             | 1.000041 |
| Iclos__1                            | 1.422322   | .2195464  | 2.28  | 0.022 | 1.051013             | 1.924808 |
| _cons                               | 2.82485    | 1.088493  | 2.69  | 0.007 | 1.327406             | 6.011556 |
| -----+-----+-----+-----+-----+----- |            |           |       |       |                      |          |
| /lnsig2u                            | .4492293   | .6411026  |       |       | -.8073086            | 1.705767 |
| -----+-----+-----+-----+-----+----- |            |           |       |       |                      |          |
| sigma_u                             | 1.25184    | .401279   |       |       | .667875              | 2.346403 |
| rho                                 | .3226504   | .1401111  |       |       | .1193967             | .6259591 |

Note: Estimates are transformed only in the first equation.  
Note: \_cons estimates baseline odds (conditional on zero random effects).  
LR test of rho=0: chibar2(01) = 6.14                                          Prob >= chibar2 = 0.007  
Deviance: 445.533.

## 8. Summary of VOC and nc\_pos

|         | % NC_pos (n/N) | Unadjusted OR (95% CI) | P-value | Adjusted OR*(95% CI) | P-value |
|---------|----------------|------------------------|---------|----------------------|---------|
| Non-VOC | 62% (63/102)   |                        |         |                      |         |
| VOC     | 82% (289/352)  | 3.5 (1.7-7.4)          | 0.001   | 2.5 (1.2-5.4)        | 0.02    |

\* adjusted for sex, age (years; linear), time since pcr\_date date to date of HH serology (days; linear), infectious index and HHC in contact (days; linear), IMD (rank; linear), close contacts (4 levels assuming a linear trend)



## 9. Summary of potential confounders with infection

```
. ***** new outcome : infected
.
. foreach var in sexnew imdnew isolatnew close_contact diffpcrzero_cat3 dayshh_cat {
2.
.     tab `var' infected, row nokey
3.     xtlogit infected i.`var', re or nolog
4.     quadchk, nooutput
5. }
```

| sexnew | INFECTED    |              | Total         |
|--------|-------------|--------------|---------------|
|        | 0           | 1            |               |
| male   | 28<br>14.51 | 165<br>85.49 | 193<br>100.00 |
| female | 42<br>16.09 | 219<br>83.91 | 261<br>100.00 |
| Total  | 70<br>15.42 | 384<br>84.58 | 454<br>100.00 |

```
Random-effects logistic regression      Number of obs   =      454
Group variable: hh_id                  Number of groups =      276

Random effects u_i ~ Gaussian          Obs per group:
                                         min =          1
                                         avg =         1.6
                                         max =          7

Integration method: mvaghermite        Integration pts. =      12

Log likelihood = -189.12006            Wald chi2(1)    =         0.47
                                         Prob > chi2     =         0.4947
```

| infected | Odds Ratio | Std. Err. | z     | P> z  | [95% Conf. Interval] |          |
|----------|------------|-----------|-------|-------|----------------------|----------|
| sexnew   |            |           |       |       |                      |          |
| female   | .77924     | .2846242  | -0.68 | 0.495 | .3808575             | 1.594337 |
| _cons    | 14.60683   | 7.184001  | 5.45  | 0.000 | 5.570756             | 38.29993 |
| /lnsig2u | 1.26862    | .5693602  |       |       | .1526943             | 2.384545 |
| sigma_u  | 1.88572    | .5368271  |       |       | 1.079337             | 3.29456  |
| rho      | .5194333   | .142125   |       |       | .2615065             | .7674018 |

```
Note: Estimates are transformed only in the first equation.
Note: _cons estimates baseline odds (conditional on zero random effects).
LR test of rho=0: chibar2(01) = 11.89      Prob >= chibar2 = 0.000
```

```
Refitting model intpoints() = 8
Refitting model intpoints() = 16
```

### Quadrature check

|                    | Fitted quadrature<br>12 points | Comparison quadrature<br>8 points     | Comparison quadrature<br>16 points    |                                   |
|--------------------|--------------------------------|---------------------------------------|---------------------------------------|-----------------------------------|
| Log likelihood     | -189.12006                     | -189.1508<br>-.03074183<br>.00016255  | -189.12425<br>-.00419064<br>.00002216 | Difference<br>Relative difference |
| infected: 1.sexnew | -.24943615                     | -.25343139<br>-.00399523<br>.01601705 | -.24967418<br>-.00023803<br>.00095427 | Difference<br>Relative difference |
| infected: _cons    | 2.6814894                      | 2.7226579<br>.04116845<br>.01535283   | 2.6817572<br>.00026779<br>.00009987   | Difference<br>Relative difference |
| /: lnsg2u          | 1.2686198                      | 1.3201621<br>.05154226<br>.04062861   | 1.2688845<br>.00026465<br>.00020862   | Difference<br>Relative difference |

```

-----
      imdnew |          INFECTED
            |          0          1 |          Total
-----+-----+-----+-----
      1st   |          17          55 |          72
            |         23.61         76.39 |         100.00
-----+-----+-----+-----
      2nd   |           3          34 |          37
            |          8.11         91.89 |         100.00
-----+-----+-----+-----
      3rd   |          32         206 |         238
            |         13.45         86.55 |         100.00
-----+-----+-----+-----
      4th   |          18          89 |         107
            |         16.82         83.18 |         100.00
-----+-----+-----+-----
      Total |          70         384 |         454
            |         15.42         84.58 |         100.00

```

```

Random-effects logistic regression      Number of obs   =         454
Group variable: hh_id                 Number of groups =         276

Random effects u_i ~ Gaussian          Obs per group:
                                         min =          1
                                         avg =          1.6
                                         max =          7

Integration method: mvaghermite        Integration pts. =         12

Log likelihood = -187.03158            Wald chi2(3)    =          4.20
                                         Prob > chi2     =         0.2406

```

```

-----
      infected | Odds Ratio   Std. Err.      z    P>|z|    [95% Conf. Interval]
-----+-----+-----+-----+-----+-----
      imdnew   |
      2nd     |   5.122131   4.962827     1.69  0.092    .7668712   34.21204
      3rd     |   2.707812   1.565596     1.72  0.085    .8719126   8.409381
      4th     |   1.729985   1.081287     0.88  0.381    .5081808   5.889335
      _cons   |   5.625091   3.024681     3.21  0.001    1.960776   16.13731
      /lnsig2u |   1.187346   .5951741                .0208259   2.353865
-----+-----+-----+-----+-----+-----
      sigma_u  |   1.810626   .5388189                1.010467   3.244407
      rho     |   .4991245   .1487931                .2368511   .7618807
-----+-----+-----+-----+-----+-----

```

```

Note: Estimates are transformed only in the first equation.
Note: _cons estimates baseline odds (conditional on zero random effects).
LR test of rho=0: chibar2(01) = 10.33      Prob >= chibar2 = 0.001

```

```

Refitting model intpoints() = 8
Refitting model intpoints() = 16

```

Quadrature check

```

-----
      Fitted      Comparison      Comparison
      quadrature  quadrature      quadrature
      12 points   8 points        16 points
-----+-----+-----+-----+-----
Log likelihood  -187.03158      -187.04944      -187.034
                                         Difference
                                         Relative difference
-----+-----+-----+-----+-----
infected: 1.imdnew  1.6335705      1.6524734      1.6347075
                                         Difference
                                         Relative difference
                                         .01890289      .00113693
                                         .01157152      .00069598
-----+-----+-----+-----+-----
infected: 2.imdnew  .9961409       1.0105823      .99658433
                                         Difference
                                         Relative difference
                                         .01444139      .00044343
                                         .01449733      .00044515
-----+-----+-----+-----+-----
infected: 3.imdnew  .54811249      .55427786      .54816655
                                         Difference
                                         Relative difference
                                         .00616537      .00005405
                                         .01124837      .00009862
-----+-----+-----+-----+-----

```

```

infected:      1.727237      1.7452364      1.726907
  _cons        .01799937      .0104209      -.00033002      Difference
                .0104209      -.00019107      Relative difference
-----
/:            1.1873457      1.2278071      1.1872109
  lnsig2u      .04046143      -.00013471      -.00011345      Difference
                .03407721      -.00011345      Relative difference
-----

```

| isolatenew | INFECTED |       | Total  |
|------------|----------|-------|--------|
|            | 0        | 1     |        |
| no         | 40       | 283   | 323    |
|            | 12.38    | 87.62 | 100.00 |
| yes        | 30       | 101   | 131    |
|            | 22.90    | 77.10 | 100.00 |
| Total      | 70       | 384   | 454    |
|            | 15.42    | 84.58 | 100.00 |

```

Random-effects logistic regression      Number of obs   =      454
Group variable: hh_id                  Number of groups =      276

Random effects u_i ~ Gaussian          Obs per group:
                                         min =          1
                                         avg =         1.6
                                         max =          7

Integration method: mvaghermite        Integration pts. =      12

Log likelihood = -186.66877             Wald chi2(1)    =         4.94
                                         Prob > chi2     =         0.0262

```

| infected   | Odds Ratio | Std. Err. | z     | P> z  | [95% Conf. Interval] |          |
|------------|------------|-----------|-------|-------|----------------------|----------|
| isolatenew |            |           |       |       |                      |          |
| yes        | .364505    | .1655033  | -2.22 | 0.026 | .149698              | .8875463 |
| _cons      | 15.93961   | 7.471103  | 5.91  | 0.000 | 6.360752             | 39.94358 |
| /lnsig2u   | 1.142566   | .6111612  |       |       | -.0552882            | 2.34042  |
| sigma_u    | 1.770537   | .5410418  |       |       | .9727345             | 3.222669 |
| rho        | .4879319   | .1527013  |       |       | .2233698             | .7594328 |

```

Note: Estimates are transformed only in the first equation.
Note: _cons estimates baseline odds (conditional on zero random effects).
LR test of rho=0: chibar2(01) = 9.57      Prob >= chibar2 = 0.001

```

```

Refitting model intpoints() = 8
Refitting model intpoints() = 16

```

Quadrature check

|                | Fitted quadrature<br>12 points | Comparison quadrature<br>8 points | Comparison quadrature<br>16 points |                     |
|----------------|--------------------------------|-----------------------------------|------------------------------------|---------------------|
| Log likelihood | -186.66877                     | -186.6835                         | -186.67081                         |                     |
|                |                                | -.01473135                        | -.0020341                          | Difference          |
|                |                                | .00007892                         | .0000109                           | Relative difference |
| infected:      | -1.0092149                     | -1.0216711                        | -1.0100267                         |                     |
| 1.isolatenew   |                                | -.01245616                        | -.00081181                         | Difference          |
|                |                                | .01234242                         | .0008044                           | Relative difference |
| infected:      | 2.7688072                      | 2.7982461                         | 2.770061                           |                     |
| _cons          |                                | .02943888                         | .00125377                          | Difference          |
|                |                                | .01063233                         | .00045282                          | Relative difference |
| /:             | 1.1425657                      | 1.1812145                         | 1.1441298                          |                     |
| lnsig2u        |                                | .03864879                         | .0015641                           | Difference          |
|                |                                | .03382632                         | .00136894                          | Relative difference |

| close_cont<br>act | INFECTED |       | Total  |
|-------------------|----------|-------|--------|
|                   | 0        | 1     |        |
| 0                 | 17       | 51    | 68     |
|                   | 25.00    | 75.00 | 100.00 |
| 1                 | 21       | 136   | 157    |
|                   | 13.38    | 86.62 | 100.00 |
| 2                 | 11       | 62    | 73     |
|                   | 15.07    | 84.93 | 100.00 |
| 3                 | 21       | 135   | 156    |
|                   | 13.46    | 86.54 | 100.00 |
| Total             | 70       | 384   | 454    |
|                   | 15.42    | 84.58 | 100.00 |

Random-effects logistic regression  
Group variable: hh\_id

Number of obs = 454  
Number of groups = 276

Random effects u\_i ~ Gaussian

Obs per group:  
min = 1  
avg = 1.6  
max = 7

Integration method: mvaghermite

Integration pts. = 12

Log likelihood = -186.36335

Wald chi2(3) = 5.10  
Prob > chi2 = 0.1646

| infected      | Odds Ratio | Std. Err. | z    | P> z  | [95% Conf. Interval] |          |
|---------------|------------|-----------|------|-------|----------------------|----------|
| close_contact |            |           |      |       |                      |          |
| 1             | 3.707632   | 2.323878  | 2.09 | 0.037 | 1.085372             | 12.66528 |
| 2             | 3.828124   | 2.805632  | 1.83 | 0.067 | .9102076             | 16.10021 |
| 3             | 3.306103   | 2.006683  | 1.97 | 0.049 | 1.006163             | 10.86336 |
| _cons         | 4.806467   | 2.543582  | 2.97 | 0.003 | 1.70361              | 13.56069 |
| /lnsig2u      | 1.435319   | .5863963  |      |       | .2860032             | 2.584635 |
| sigma_u       | 2.04963    | .6009478  |      |       | 1.153732             | 3.641214 |
| rho           | .5608152   | .1444303  |      |       | .288056              | .8011961 |

Note: Estimates are transformed only in the first equation.

Note: \_cons estimates baseline odds (conditional on zero random effects).

LR test of rho=0: chibar2(01) = 12.45 Prob >= chibar2 = 0.000

Refitting model intpoints() = 8

Refitting model intpoints() = 16

#### Quadrature check

|                           | Fitted<br>quadrature<br>12 points | Comparison<br>quadrature<br>8 points | Comparison<br>quadrature<br>16 points |                     |
|---------------------------|-----------------------------------|--------------------------------------|---------------------------------------|---------------------|
| Log likelihood            | -186.36335                        | -186.40454                           | -186.37126                            |                     |
|                           |                                   | -.04118703                           | -.00791285                            | Difference          |
|                           |                                   | .000221                              | .00004246                             | Relative difference |
| infected:<br>1.close_co~t | 1.3103933                         | 1.354341                             | 1.3121941                             |                     |
|                           |                                   | .04394772                            | .00180077                             | Difference          |
|                           |                                   | .03353781                            | .00137422                             | Relative difference |
| infected:<br>2.close_co~t | 1.3423749                         | 1.3980193                            | 1.34371                               |                     |
|                           |                                   | .05564439                            | .00133513                             | Difference          |
|                           |                                   | .0414522                             | .00099461                             | Relative difference |
| infected:<br>3.close_co~t | 1.1957702                         | 1.2295811                            | 1.196857                              |                     |
|                           |                                   | .03381092                            | .00108675                             | Difference          |
|                           |                                   | .02827543                            | .00090883                             | Relative difference |
| infected:<br>_cons        | 1.5699622                         | 1.6065224                            | 1.5696796                             |                     |
|                           |                                   | .03656019                            | -.00028266                            | Difference          |

```

                                .02328731    -.00018004    Relative difference
-----
/:      1.4353188    1.5227711    1.4366071
lnsig2u    .08745226    .00128826    Difference
                                .0609288    .00089754    Relative difference
-----

```

```

RECODE of |
diffpcrser |      INFECTED
  o |      0      1 |      Total
-----+-----+-----
<100 |      9      95 |     104
      |     8.65    91.35 |    100.00
-----+-----+-----
100-150 |     36     170 |     206
      |    17.48    82.52 |    100.00
-----+-----+-----
>150 |     25     119 |     144
      |    17.36    82.64 |    100.00
-----+-----+-----
Total |     70     384 |     454
      |    15.42    84.58 |    100.00
-----

```

```

Random-effects logistic regression      Number of obs    =      454
Group variable: hh_id                  Number of groups =      276

Random effects u_i ~ Gaussian          Obs per group:
                                         min =           1
                                         avg =          1.6
                                         max =           7

Integration method: mvaghermite        Integration pts. =      12

Log likelihood = -186.63517            Wald chi2(2)     =       4.29
                                         Prob > chi2      =     0.1173

```

```

-----
infected | Odds Ratio   Std. Err.      z    P>|z|    [95% Conf. Interval]
-----+-----+-----+-----+-----
diffpcrsero_cat3 |
  100-150 |    .276207   .1805619   -1.97  0.049    .0766986    .9946762
  >150   |    .2710302  .1847091   -1.92  0.055    .0712718    1.030666
  _cons  |    36.349    28.04112    4.66  0.000    8.013837    164.8711
-----+-----+-----+-----+-----
/lnsig2u |    1.264507  .5691402                .149013    2.380002
-----+-----+-----+-----+-----
sigma_u |    1.881847  .5355173                1.077352    3.287084
rho     |    .5184066  .1420922                .2607962    .7665897
-----

```

```

Note: Estimates are transformed only in the first equation.
Note: _cons estimates baseline odds (conditional on zero random effects).
LR test of rho=0: chibar2(01) = 11.81      Prob >= chibar2 = 0.000

```

```

Refitting model intpoints() = 8
Refitting model intpoints() = 16

```

Quadrature check

```

-----
Fitted      Comparison      Comparison
quadrature  quadrature  quadrature
12 points   8 points    16 points
-----+-----+-----+-----
Log          -186.63517  -186.65771  -186.63755
likelihood   -0.0225399  -0.00238026 -0.00238026    Difference
                                .00012077    .00001275    Relative difference
-----+-----+-----+-----
infected:   -1.2866048  -1.3056558  -1.2885305
2.diffpcrs~3  -.01905103  -.00192576  -.00192576    Difference
                                .01480721    .00149678    Relative difference
-----+-----+-----+-----
infected:   -1.3055249  -1.3257099  -1.30756
3.diffpcrs~3  -.02018494  -.00203506  -.00203506    Difference
                                .01546117    .0015588     Relative difference
-----+-----+-----+-----
infected:   3.5931667   3.6406295   3.5956352
_cons       .04746282    .00246852    Difference
-----

```

```

-----
.01320919 .000687 Relative difference
/: 1.2645073 1.3067693 1.2657784
lnsig2u .04226203 .00127112 Difference
.03342174 .00100523 Relative difference
-----

```

| RECODE of<br>dayshh | INFECTED    |              | Total         |
|---------------------|-------------|--------------|---------------|
|                     | 0           | 1            |               |
| 0                   | 14<br>25.00 | 42<br>75.00  | 56<br>100.00  |
| 1-3d                | 17<br>20.48 | 66<br>79.52  | 83<br>100.00  |
| 4-7d                | 22<br>16.06 | 115<br>83.94 | 137<br>100.00 |
| >7d                 | 17<br>9.55  | 161<br>90.45 | 178<br>100.00 |
| Total               | 70<br>15.42 | 384<br>84.58 | 454<br>100.00 |

```

Random-effects logistic regression      Number of obs = 454
Group variable: hh_id                 Number of groups = 276

Random effects u_i ~ Gaussian          Obs per group:
                                        min = 1
                                        avg = 1.6
                                        max = 7

Integration method: mvaghermite        Integration pts. = 12

Log likelihood = -184.41434             Wald chi2(3) = 7.45
                                        Prob > chi2 = 0.0588

```

| infected   | Odds Ratio | Std. Err. | z    | P> z  | [95% Conf. Interval] |          |
|------------|------------|-----------|------|-------|----------------------|----------|
| dayshh_cat |            |           |      |       |                      |          |
| 1-3d       | 1.308621   | .8418139  | 0.42 | 0.676 | .3708942             | 4.617188 |
| 4-7d       | 2.475324   | 1.589671  | 1.41 | 0.158 | .7030465             | 8.715252 |
| >7d        | 5.627842   | 3.942839  | 2.47 | 0.014 | 1.425589             | 22.21721 |
| _cons      | 4.992694   | 2.834152  | 2.83 | 0.005 | 1.641126             | 15.18896 |
| /lnsig2u   | 1.283373   | .5968239  |      |       | .1136198             | 2.453126 |
| sigma_u    | 1.899682   | .5668878  |      |       | 1.058455             | 3.409492 |
| rho        | .5231149   | .1488871  |      |       | .254031              | .7794182 |

```

Note: Estimates are transformed only in the first equation.
Note: _cons estimates baseline odds (conditional on zero random effects).
LR test of rho=0: chibar2(01) = 11.22      Prob >= chibar2 = 0.000

```

```

Refitting model intpoints() = 8
Refitting model intpoints() = 16

```

Quadrature check

|                           | Fitted<br>quadrature<br>12 points | Comparison<br>quadrature<br>8 points | Comparison<br>quadrature<br>16 points |                     |
|---------------------------|-----------------------------------|--------------------------------------|---------------------------------------|---------------------|
| Log likelihood            | -184.41434                        | -184.43371                           | -184.41696                            |                     |
|                           |                                   | -.01936883                           | -.0026269                             | Difference          |
|                           |                                   | .00010503                            | .00001424                             | Relative difference |
| infected:<br>1.dayshh_cat | .26897372                         | .26949963                            | .26894139                             |                     |
|                           |                                   | .00052591                            | -.00003233                            | Difference          |
|                           |                                   | .00195523                            | -.00012021                            | Relative difference |
| infected:<br>2.dayshh_cat | .90637119                         | .92567195                            | .90733675                             |                     |
|                           |                                   | .01930076                            | .00096556                             | Difference          |
|                           |                                   | .02129454                            | .0010653                              | Relative difference |

```

-----
infected:      1.7277261      1.7565796      1.730153
3.dayshh_cat  .02885345      .00242684      .00242684      Difference
                .01670024      .00140465      .00140465      Relative difference
-----
infected:      1.6079757      1.6282628      1.608615
  _cons        .02028706      .00063934      .00063934      Difference
                .01261652      .00039761      .00039761      Relative difference
-----
/:             1.2833731      1.3332178      1.285901
lnsig2u       .04984464      .00252788      .00252788      Difference
                .03883877      .00196971      .00196971      Relative difference
-----

```

.

## 10. Summary of VOC and infection - unadjusted

```
. tab vocnew infected, row
```

| vocnew  | INFECTED |       | Total  |
|---------|----------|-------|--------|
|         | 0        | 1     |        |
| Non-VOC | 25       | 77    | 102    |
|         | 24.51    | 75.49 | 100.00 |
| VOC     | 45       | 307   | 352    |
|         | 12.78    | 87.22 | 100.00 |
| Total   | 70       | 384   | 454    |
|         | 15.42    | 84.58 | 100.00 |

```
. xtlogit infected i.vocnew, re or nolog/* Random effects logistic. [3.54] NB: rho is large
(0.33) so numerical approx should be checked*/
```

```

Random-effects logistic regression          Number of obs   =       454
Group variable: hh_id                     Number of groups =       276

Random effects u_i ~ Gaussian              Obs per group:
                                           min =           1
                                           avg =           1.6
                                           max =           7

Integration method: mvaghermite            Integration pts. =       12

Log likelihood = -186.37494                Wald chi2(1)    =         5.33
                                           Prob > chi2     =         0.0210

```

| infected | Odds Ratio | Std. Err. | z    | P> z  | [95% Conf. Interval] |
|----------|------------|-----------|------|-------|----------------------|
| vocnew   |            |           |      |       |                      |
| VOC      | 3.134187   | 1.551193  | 2.31 | 0.021 | 1.188071 8.268132    |
| _cons    | 5.060994   | 2.296476  | 3.57 | 0.000 | 2.079672 12.3162     |
| /lnsig2u | 1.17917    | .5982633  |      |       | .0065957 2.351745    |
| sigma_u  | 1.80324    | .5394062  |      |       | 1.003303 3.240969    |
| rho      | .4970807   | .1495607  |      |       | .2342886 .7614957    |

```

Note: Estimates are transformed only in the first equation.
Note: _cons estimates baseline odds (conditional on zero random effects).
LR test of rho=0: chibar2(01) = 9.97          Prob >= chibar2 = 0.001

```

```
. quadchk, nooutput
```

```

Refitting model intpoints() = 8
Refitting model intpoints() = 16

```

Quadrature check

| Fitted quadrature | Comparison quadrature | Comparison quadrature |
|-------------------|-----------------------|-----------------------|
| 12 points         | 8 points              | 16 points             |

```

-----
Log          -186.37494      -186.39031      -186.37744
likelihood   -.01537189        -.00249734
              .00008248          .0000134
Difference
Relative difference
-----
infected:    1.1423699        1.1598928        1.1428786
1.vocnew     .01752297         .00050875
              .01533914          .00044535
Difference
Relative difference
-----
infected:    1.621563         1.6375047        1.6213921
_cons       .01594172         -.00017092
              .00983108          -.0001054
Difference
Relative difference
-----
/:          1.1791702         1.2212503        1.1792722
lnsig2u     .04208005         .00010197
              .03568615          .00008648
Difference
Relative difference
-----

```

## 11. Summary of VOC and infection – adjusted (with continuous covariates + age assessed using fractional polynomials); plsu adjustment for close contact (as a factor)

```

. * fractional polynomials for continuous terms for agenevm, diffpcrsero and dayshh
. mfp: xtlogit infected vocnew sexnew agenevm diffpcrsero dayshh imd_rank close_contacta
close_contactb close_contactc, re or nolog

```

Deviance for model with all terms untransformed = 358.230, 454 observations

| Variable                                     | Model (vs.) | Deviance | Dev diff. | P     | Powers | (vs.) |
|----------------------------------------------|-------------|----------|-----------|-------|--------|-------|
| agenevm                                      | lin. FP2    | 358.230  | 4.078     | 0.253 | 1      | .5 1  |
|                                              | Final       | 358.230  |           |       | 1      |       |
| [close_contactc included with 1 df in model] |             |          |           |       |        |       |
| [close_contactb included with 1 df in model] |             |          |           |       |        |       |
| [close_contacta included with 1 df in model] |             |          |           |       |        |       |
| [vocnew included with 1 df in model]         |             |          |           |       |        |       |
| diffpcrsero                                  | lin. FP2    | 358.230  | 2.482     | 0.479 | 1      | -2 -2 |
|                                              | Final       | 358.230  |           |       | 1      |       |
| [sexnew included with 1 df in model]         |             |          |           |       |        |       |
| imd_rank                                     | lin. FP2    | 358.230  | 0.368     | 0.947 | 1      | 1 1   |
|                                              | Final       | 358.230  |           |       | 1      |       |
| dayshh                                       | lin. FP2    | 358.230  | 5.165     | 0.160 | 1      | 1 2   |
|                                              | Final       | 358.230  |           |       | 1      |       |

Fractional polynomial fitting algorithm converged after 1 cycle.

Transformations of covariates:

```

-> gen double Iagen__1 = agenevm-41.10352423 if e(sample)
-> gen double Idiff__1 = diffpcrsero-130.7400881 if e(sample)
-> gen double Idays__1 = dayshh-8.372246696 if e(sample)
-> gen double Iimd__1 = imd_rank-11221.59251 if e(sample)

```

Final multivariable fractional polynomial model for infected

```

-----
Variable | -----Initial-----      -----Final-----
          | df      Select  Alpha  Status  df      Powers
-----+-----+-----+-----+-----+-----+-----
vocnew   | 1      1.0000  0.0500  in      1      1
sexnew   | 1      1.0000  0.0500  in      1      1
agenevm  | 4      1.0000  0.0500  in      1      1
diffpcrsero | 4      1.0000  0.0500  in      1      1
dayshh   | 4      1.0000  0.0500  in      1      1
-----

```



```

    imd_rank |      4      1.0000  0.0500   in   1   1
close_con... |      1      1.0000  0.0500   in   1   1
close_con... |      1      1.0000  0.0500   in   1   1
close_con... |      1      1.0000  0.0500   in   1   1
-----

```

```

Random-effects logistic regression          Number of obs   =      454
Group variable: hh_id                     Number of groups =      276

Random effects u_i ~ Gaussian              Obs per group:
                                           min =          1
                                           avg =         1.6
                                           max =          7

Integration method: mvaghermite            Integration pts. =       12

Log likelihood = -179.11476                Wald chi2(9)     =       12.79
                                           Prob > chi2      =       0.1723

```

|                | infected | Odds Ratio | Std. Err. | z     | P> z  | [95% Conf. Interval] |          |
|----------------|----------|------------|-----------|-------|-------|----------------------|----------|
| vocnew         |          | 2.342272   | 1.286055  | 1.55  | 0.121 | .7984979             | 6.870696 |
| sexnew         |          | .7827221   | .3016591  | -0.64 | 0.525 | .3677533             | 1.665937 |
| Iagen__1       |          | .9782973   | .0096063  | -2.23 | 0.025 | .9596493             | .9973076 |
| Idiff__1       |          | .9916954   | .006634   | -1.25 | 0.213 | .9787779             | 1.004783 |
| Idays__1       |          | 1.0134     | .0286187  | 0.47  | 0.637 | .9588321             | 1.071073 |
| Iimd__1        |          | .9999853   | .0000284  | -0.52 | 0.605 | .9999297             | 1.000041 |
| close_contacta |          | 3.208471   | 2.036449  | 1.84  | 0.066 | .9247665             | 11.13177 |
| close_contactb |          | 4.814071   | 3.761967  | 2.01  | 0.044 | 1.040732             | 22.26824 |
| close_contactc |          | 3.959331   | 2.639507  | 2.06  | 0.039 | 1.071924             | 14.62445 |
| _cons          |          | 2.809021   | 1.84322   | 1.57  | 0.115 | .7762733             | 10.16472 |
| -----          |          |            |           |       |       |                      |          |
| /lnsig2u       |          | 1.280453   | .6386182  |       |       | .0287844             | 2.532122 |
| -----          |          |            |           |       |       |                      |          |
| sigma_u        |          | 1.896911   | .6057008  |       |       | 1.014496             | 3.546853 |
| rho            |          | .5223864   | .1593345  |       |       | .2382926             | .7926994 |

```

Note: Estimates are transformed only in the first equation.
Note: _cons estimates baseline odds (conditional on zero random effects).
LR test of rho=0: chibar2(01) = 9.45          Prob >= chibar2 = 0.001
Deviance: 358.230.

```

## 12. Summary of VOC and infection – adjusted (with continuous covariates + age assessed using fractional polynomials); plus adjustment for close contact (as a quantitative variable)

```

. mfp: xtlogit infected vocnew sexnew agenew diffpcrsero dayshh imd_rank close_contact, re or nolog

```

```

Deviance for model with all terms untransformed = 361.053, 454 observations

```

| Variable                             | Model (vs.) | Deviance | Dev diff. | P     | Powers | (vs.) |       |
|--------------------------------------|-------------|----------|-----------|-------|--------|-------|-------|
| agenew                               | lin.        | FP2      | 361.053   | 4.820 | 0.185  | 1     | .5 1  |
|                                      | Final       |          | 361.053   |       |        | 1     |       |
| close_con...                         | lin.        | FP1      | 361.053   | 2.619 | 0.106  | 1     | -2    |
|                                      | Final       |          | 361.053   |       |        | 1     |       |
| [vocnew included with 1 df in model] |             |          |           |       |        |       |       |
| diffpcrsero                          | lin.        | FP2      | 361.053   | 2.812 | 0.422  | 1     | -2 -2 |
|                                      | Final       |          | 361.053   |       |        | 1     |       |
| imd_rank                             | lin.        | FP2      | 361.053   | 0.401 | 0.940  | 1     | 1 1   |
|                                      | Final       |          | 361.053   |       |        | 1     |       |
| dayshh                               | lin.        | FP2      | 361.053   | 6.643 | 0.084  | 1     | 1 2   |
|                                      | Final       |          | 361.053   |       |        | 1     |       |

[sexnew included with 1 df in model]

Fractional polynomial fitting algorithm converged after 1 cycle.

Transformations of covariates:

```
-> gen double Iagen__1 = agenew-41.10352423 if e(sample)
-> gen double Idiff__1 = diffpcrsero-130.7400881 if e(sample)
-> gen double Idays__1 = dayshh-8.372246696 if e(sample)
-> gen double Iimd__1 = imd_rank-11221.59251 if e(sample)
-> gen double Iclos__1 = close_contact-1.698237885 if e(sample)
```

Final multivariable fractional polynomial model for infected

| Variable     | -----Initial----- |        |        | -----Final----- |    |        |
|--------------|-------------------|--------|--------|-----------------|----|--------|
|              | df                | Select | Alpha  | Status          | df | Powers |
| vocnew       | 1                 | 1.0000 | 0.0500 | in              | 1  | 1      |
| sexnew       | 1                 | 1.0000 | 0.0500 | in              | 1  | 1      |
| agenew       | 4                 | 1.0000 | 0.0500 | in              | 1  | 1      |
| diffpcrsero  | 4                 | 1.0000 | 0.0500 | in              | 1  | 1      |
| dayshh       | 4                 | 1.0000 | 0.0500 | in              | 1  | 1      |
| imd_rank     | 4                 | 1.0000 | 0.0500 | in              | 1  | 1      |
| close_con... | 2                 | 1.0000 | 0.0500 | in              | 1  | 1      |

```
Random-effects logistic regression          Number of obs   =      454
Group variable: hh_id                     Number of groups =      276

Random effects u_i ~ Gaussian              Obs per group:
                                           min =          1
                                           avg =         1.6
                                           max =          7

Integration method: mvaghermite            Integration pts. =      12

Log likelihood = -180.52669                 Wald chi2(7)    =      12.81
                                           Prob > chi2     =      0.0769
```

| infected | Odds Ratio | Std. Err. | z     | P> z  | [95% Conf. Interval] |          |
|----------|------------|-----------|-------|-------|----------------------|----------|
| vocnew   | 2.114488   | 1.069077  | 1.48  | 0.139 | .7849484             | 5.695993 |
| sexnew   | .7891921   | .2892698  | -0.65 | 0.518 | .3847548             | 1.618756 |
| Iagen__1 | .9794929   | .0088218  | -2.30 | 0.021 | .9623542             | .9969369 |
| Idiff__1 | .991273    | .0062188  | -1.40 | 0.162 | .979159              | 1.003537 |
| Idays__1 | 1.017929   | .0272873  | 0.66  | 0.507 | .9658271             | 1.07284  |
| Iimd__1  | .9999826   | .000026   | -0.67 | 0.504 | .9999317             | 1.000034 |
| Iclos__1 | 1.412299   | .2738079  | 1.78  | 0.075 | .9658307             | 2.065154 |
| _cons    | 8.211732   | 4.589491  | 3.77  | 0.000 | 2.746016             | 24.55651 |
| /lnsig2u | 1.069111   | .6310277  |       |       | -.1676807            | 2.305903 |
| sigma_u  | 1.706689   | .5384842  |       |       | .9195781             | 3.167527 |
| rho      | .4696034   | .1571739  |       |       | .2044796             | .7530703 |

Note: Estimates are transformed only in the first equation.  
Note: \_cons estimates baseline odds (conditional on zero random effects).  
LR test of rho=0: chibar2(01) = 8.20 Prob >= chibar2 = 0.002  
Deviance: 361.053.

### 13. Summary of VOC and infection – adjusted (with continuous covariates + age assessed using fractional polynomials); no adjustment for close contact

```
. mfp: xtlogit infected vocnew sexnew agenew diffpcrsero dayshh imd_rank , re or nolog
```

Deviance for model with all terms untransformed = 364.540, 454 observations

| Variable | Model (vs.) | Deviance | Dev diff. | P | Powers | (vs.) |
|----------|-------------|----------|-----------|---|--------|-------|
|----------|-------------|----------|-----------|---|--------|-------|

```
-----
agenew      lin.   FP2    364.540    3.859  0.277    1          .5 .5
           Final    364.540
           1
```

[vocnew included with 1 df in model]

```
diffpcrsero lin.   FP2    364.540    3.082  0.379    1          -2 -2
           Final    364.540
           1
```

```
dayshh      lin.   FP2    364.540    8.447  0.038+   1          1 2
           FP1    360.471    4.378  0.112   -.5
           Final    360.471   -.5
```

```
imd_rank    lin.   FP2    360.471    0.191  0.979    1          1 2
           Final    360.471
           1
```

[sexnew included with 1 df in model]

```
-----
End of Cycle 1: deviance =    360.471
-----
```

```
agenew      lin.   FP2    360.471    4.392  0.222    1          .5 1
           Final    360.471
           1
```

[vocnew included with 1 df in model]

```
diffpcrsero lin.   FP2    360.471    2.890  0.409    1          -2 -2
           Final    360.471
           1
```

```
dayshh      lin.   FP2    364.540    8.447  0.038+   1          1 2
           FP1    360.471    4.378  0.112   -.5
           Final    360.471   -.5
```

```
imd_rank    lin.   FP2    360.471    0.191  0.979    1          1 2
           Final    360.471
           1
```

[sexnew included with 1 df in model]

Fractional polynomial fitting algorithm converged after 2 cycles.

Transformations of covariates:

```
-> gen double Iagen__1 = agenew-41.10352423 if e(sample)
-> gen double Idiff__1 = diffpcrsero-130.7400881 if e(sample)
-> gen double Idays__1 = X^-.5-1.032947251 if e(sample)
    (where: X = (dayshh+1)/10)
-> gen double Iimd__1 = imd_rank-11221.59251 if e(sample)
```

Final multivariable fractional polynomial model for infected

```
-----
Variable |      -----Initial-----      -----Final-----
          |      df      Select      Alpha      Status      df      Powers
-----|-----|-----|-----|-----|-----|-----
vocnew |      1      1.0000      0.0500      in          1          1
sexnew |      1      1.0000      0.0500      in          1          1
agenew |      4      1.0000      0.0500      in          1          1
diffpcrsero |      4      1.0000      0.0500      in          1          1
dayshh |      4      1.0000      0.0500      in          2          -.5
imd_rank |      4      1.0000      0.0500      in          1          1
-----|-----|-----|-----|-----|-----|-----
```

```
Random-effects logistic regression          Number of obs    =    454
Group variable: hh_id                      Number of groups  =    276
```

```
Random effects u_i ~ Gaussian              Obs per group:
                                           min =    1
                                           avg =    1.6
                                           max =    7
```

```
Integration method: mvaghermite           Integration pts. =    12
```

```
Log likelihood = -180.23557                Wald chi2(6)     =    13.17
                                           Prob > chi2      =    0.0404
```

| infected | Odds Ratio | Std. Err. | z     | P> z  | [95% Conf. Interval] |          |
|----------|------------|-----------|-------|-------|----------------------|----------|
| vocnew   | 1.982537   | 1.002312  | 1.35  | 0.176 | .7360017             | 5.340275 |
| sexnew   | .855008    | .3079181  | -0.43 | 0.664 | .4221073             | 1.731879 |
| Iagen__1 | .983049    | .0082945  | -2.03 | 0.043 | .9669258             | .9994411 |
| Idiff__1 | .9921711   | .0060788  | -1.28 | 0.200 | .9803281             | 1.004157 |
| Idays__1 | .5641195   | .1477865  | -2.19 | 0.029 | .3375792             | .9426849 |
| Iimd__1  | .9999812   | .0000257  | -0.73 | 0.466 | .9999309             | 1.000032 |
| _cons    | 10.15828   | 6.011574  | 3.92  | 0.000 | 3.184837             | 32.40061 |
| /lnsig2u | 1.042304   | .640488   |       |       | -.2130291            | 2.297638 |
| sigma_u  | 1.683967   | .5392803  |       |       | .898962              | 3.154465 |
| rho      | .4629324   | .159242   |       |       | .1972017             | .7515303 |

Note: Estimates are transformed only in the first equation.  
Note: \_cons estimates baseline odds (conditional on zero random effects).  
LR test of rho=0: chibar2(01) = 7.86 Prob >= chibar2 = 0.003  
Deviance: 360.471.

## 14. Summary of VOC and infection

|         | % infection (n/N) | Unadjusted OR (95% CI) | P-value | Adjusted OR* (95% CI) | P-value |
|---------|-------------------|------------------------|---------|-----------------------|---------|
| Non-VOC | 75% (77/102)      |                        |         |                       |         |
| VOC     | 87% (307/352)     | 3.1 (1.2-8.3)          | 0.02    | 2.1 (0.8-5.5)         | 0.14    |

\* adjusted for sex, age (years; linear), time since pcr\_date date to date of HH serology (days; linear), infectious index and HHC in contact (days; linear), IMD (rank; linear), close contacts (4 levels assuming a linear trend)

Table 3. Co-variate impact on seropositivity of household contacts in a multivariate logistic regression model, results displayed for both unadjusted model and adjusted for household clustering

|       |                                                 | Model 1<br>NC positive as outcome<br>n=352 |                  |         |              | Model 2<br>All NC positive &<br>Unvaccinated Spike positive<br>as outcome<br>n=384 |         |  |
|-------|-------------------------------------------------|--------------------------------------------|------------------|---------|--------------|------------------------------------------------------------------------------------|---------|--|
|       |                                                 | Adjusted Odds Ratio                        |                  |         |              | Adjusted Odds Ratio                                                                |         |  |
|       |                                                 | NC positive                                | aOR(95%CI)       | p-value | All infected | aOR(95%CI)                                                                         | p-value |  |
| Index | NonVOC SARS-CoV-2                               | 63/102                                     | *baseline        |         | 77/102       |                                                                                    |         |  |
|       | VOC SARS-CoV-2                                  | 289/352                                    | 2.26 (1.03-4.90) | 0.04    | 307/352      |                                                                                    |         |  |
|       | Days at home whilst symptomatic<br>Median (IQR) | 7(3-12)                                    | 1.02 (0.98-1.07) | 0.3     | 7(3-12)      |                                                                                    |         |  |
|       | IMD quartile<br>Lowest (1-2.5)                  | 81/107                                     | *baseline        |         | 89/107       |                                                                                    |         |  |

|                               |                                       |                             |               |                  |      |               |  |  |
|-------------------------------|---------------------------------------|-----------------------------|---------------|------------------|------|---------------|--|--|
|                               |                                       | <b>Second (&gt;2.5-5)</b>   | 187/238       | 1.44 (0.70-2.96) | 0.3  | 206/238       |  |  |
|                               |                                       | <b>Third (&gt;5-7.5)</b>    | 33/37         | 1.58 (0.49-5.07) | 0.4  | 34/37         |  |  |
|                               |                                       | <b>Highest (&gt;7.5-10)</b> | 51/72         | 1.27 (0.48-3.34) | 0.6  | 55/72         |  |  |
|                               | <b>Time since index PCR diagnosis</b> |                             | 130 (101-159) | 0.99 (0.98-0.99) | 0.04 | 130 (101-159) |  |  |
| <b>Contact</b>                | <b>sex</b>                            | <b>female</b>               | 202/261       | baseline         |      | 219/261       |  |  |
|                               |                                       | <b>male</b>                 | 150/193       | 1.13 (0.64-1.98) | 0.7  | 165/193       |  |  |
| <b>Intensity of Contact**</b> | <b>No close contact within home</b>   |                             | 44/68         | *baseline        |      | 51/68         |  |  |
|                               | <b>Shared bathroom</b>                |                             | 118/157       | 1.94 (0.80-4.69) | 0.14 | 136/157       |  |  |
|                               | <b>Shared bedroom</b>                 |                             | 61/75         | 2.98 (1.04-8.58) | 0.04 | 64/75         |  |  |
|                               | <b>Help with personal care</b>        |                             | 129/154       | 3.38 (1.31-8.75) | 0.01 | 133/154       |  |  |

Table. 1  
Baseline characteristics stratified by Indices VOC and non-VOC SARS-CoV-2 variant status for whom we have serum Total N = 454

|                              | Non-VOC index case household | Alpha index case household | p-value* |
|------------------------------|------------------------------|----------------------------|----------|
| Number of index - n          | 50                           | 188                        |          |
| Number of contacts - n       | 102                          | 352                        |          |
| <b>Index characteristics</b> |                              |                            |          |
| index case female - n (%)    | 26 (52)                      | 111 (59)                   | 0.3      |

|                                              |                    |               |              |        |
|----------------------------------------------|--------------------|---------------|--------------|--------|
| Index case age – median (IQR)                |                    | 56 (45-72)    | 57 (47-69)   | 0.9    |
| ethnicity                                    | white (%)          | 27 (54)       | 96 (51)      | 0.3    |
|                                              | Asian (%)          | 2 (4)         | 14 (8)       |        |
|                                              | Black (%)          | 7 (14)        | 34 (18)      |        |
|                                              | Middle Eastern (%) | 5 (10)        | 15 (6)       |        |
|                                              | SE Asian (%)       | 7 (14)        | 13 (7)       |        |
|                                              | other              | 2 (4)         | 8 (4.3)      |        |
| Hospital site                                | Hospital 1         | 49 (48)       | 173 (49)     | 0.8    |
|                                              | Hospital 2         | 53 (52)       | 179 (51)     |        |
| household size <sup>1</sup> – median (IQR)   |                    | 3 (2-4)       | 3 (2-4)      | >0.99  |
| index case respiratory symptoms – n (%)      |                    | 35 (70)       | 146 (78)     | 0.2    |
| symptom duration in days – median(IQR)       |                    | 7 (3-10)      | 7 (5-114)    | 0.2    |
| index case hospitalisation – n (%)           |                    | 29 (58)       | 124 (66)     | 0.3    |
| index case ICU admission – n (%)             |                    | 5 (17)        | 35 (29)      | 0.3    |
| index case mortality – n(%)                  |                    | 1 (2)         | 2 (1)        | 0.6    |
| IMD decile (IQR)                             |                    | 3 (2-6)       | 3 (2-5)      | 0.7    |
| Time since index PCR diagnosis -median (IQR) |                    | 146 (125-181) | 119 (93-157) | <0.001 |

|                                              |                           |            |            |        |
|----------------------------------------------|---------------------------|------------|------------|--------|
| <b>Contact characteristics</b>               |                           |            |            |        |
| contact female – n (%)                       |                           | 57 (56)    | 204 (58)   | 0.7    |
| contact age – median (IQR)                   |                           | 44 (22-59) | 42 (24-60) | 0.9    |
| days of exposure to index – median (IQR)     |                           | 4 (1-10)   | 7 (3-14)   | <0.001 |
| proximity to index – n (%)                   | no close contact          | 19(19)     | 49(14)     | 0.06   |
|                                              | assisted in personal care | 24 (24)    | 130 (37)   |        |
|                                              | shared bedroom            | 16 (16)    | 59 (17)    |        |
|                                              | shared bathroom           | 43 (42)    | 114 (32)   |        |
| other covid exposure (not index) – n (%)     |                           | 26 (26)    | 107 (30)   | 0.3    |
| previous COVID-19 diagnosis – n (%)          |                           | 48 (47)    | 235 (67)   | <0.001 |
| Contact symptoms - n (%)                     |                           | 40 (39)    | 183 (52)   | 0.045  |
| Long COVID - n (%)                           |                           | 4 (8)      | 8 (4)      | 0.1    |
| vaccination status at time of serum sampling | unvaccinated              | 49 (48)    | 169 (48)   | 0.4    |
|                                              | single vaccination        | 24 (24)    | 102 (29)   |        |
|                                              | double vaccination        | 29 (28)    | 81 (23)    |        |

Supplementary 1. Baseline Characteristics in participants with and without serum samples

|                                            |                    | Participants without serum samples | Participants with serum samples | p-value* |
|--------------------------------------------|--------------------|------------------------------------|---------------------------------|----------|
| Number of index - n                        |                    | 200                                | 281                             |          |
| Number of contacts - n                     |                    | 385                                | 454                             |          |
| Alpha index                                |                    | 162                                | 188                             |          |
| non-VOC index                              |                    | 38                                 | 50                              |          |
| <b>Index characteristics</b>               |                    |                                    |                                 |          |
| index case female - n (%)                  |                    | 220 (57.1%)                        | 255 (56.2%)                     | 0.3      |
| Index case age – median (IQR)              |                    | 51 (40- 64)                        | 57 (47-70)                      | 0.9      |
| ethnicity                                  | white (%)          | 27 (54)                            | 96 (51)                         | 0.3      |
|                                            | Asian (%)          | 2 (4)                              | 14 (8)                          |          |
|                                            | Black (%)          | 7 (14)                             | 34 (18)                         |          |
|                                            | Middle Eastern (%) | 5 (10)                             | 15 (6)                          |          |
|                                            | SE Asian (%)       | 7 (14)                             | 13 (7)                          |          |
|                                            | other              | 2 (4)                              | 8 (4.3)                         |          |
| Hospital site                              | Hospital 1         | 49 (48)                            | 173 (49)                        | 0.8      |
|                                            | Hospital 2         | 53 (52)                            | 179 (51)                        |          |
| household size <sup>1</sup> – median (IQR) |                    | 3 (2-4)                            | 3 (2-4)                         | >0.99    |



|                                               |                           |              |               |        |
|-----------------------------------------------|---------------------------|--------------|---------------|--------|
| index case respiratory symptoms – n (%)       |                           | 35 (70)      | 146 (78)      | 0.2    |
| symptom duration in days – median(IQR)        |                           | 7 (3-10)     | 7 (4-12)      | 0.4    |
| index case hospitalisation – n (%)            |                           | 29 (58)      | 124 (66)      | 0.3    |
| index case ICU admission – n (%)              |                           | 5 (17)       | 35 (29)       | 0.3    |
| index case mortality – n(%)                   |                           | 1 (2)        | 2 (1)         | 0.6    |
| IMD decile (IQR)                              |                           | 3 (2-6)      | 3 (2-5)       | 0.7    |
| Time since index PCR diagnosis - median (IQR) |                           | 139(111-164) | 130 (101-158) | 0.003  |
| <b>Contact characteristics</b>                |                           |              |               |        |
| contact female – n (%)                        |                           | 172 (45%)    | 204 (58)      | 0.7    |
| contact age – median (IQR)                    |                           | 25 (12-45)   | 42 (24-60)    | <0.001 |
| days of exposure to index – median (IQR)      |                           | 5 (2-10)     | 7 (3-14)      | 0.004  |
| proximity to index – n (%)                    | no close contact          | 86(22)       | 49(14)        | <0.001 |
|                                               | assisted in personal care | 167 (43)     | 130 (37)      |        |
|                                               | shared bedroom            | 37 (10)      | 59 (17)       |        |
|                                               | shared bathroom           | 97 (25)      | 114 (32)      |        |
| other covid exposure (not index) – n (%)      |                           | 26 (26)      | 107 (30)      | 0.3    |

|                                                    |                       |         |          |        |
|----------------------------------------------------|-----------------------|---------|----------|--------|
| previous COVID-19 diagnosis – n (%)                |                       | 48 (47) | 235 (67) | <0.001 |
| Contact symptoms - n (%)                           |                       | 40 (39) | 183 (52) | 0.045  |
| Long COVID - n (%)                                 |                       | 4 (8)   | 8 (4)    | 0.1    |
| vaccination status<br>at time of serum<br>sampling | unvaccinated          | 260(68) | 169 (48) | <0.001 |
|                                                    | single<br>vaccination | 68(18)  | 102 (29) |        |
|                                                    | double<br>vaccination | 57(15)  | 81 (23)  |        |

Supplementary Figure 1

Correlation of antibody titres between

- (i) Log normalised alpha VOC vrs non-VOC SARS-CoV-2 spike protein
- (ii) Log normalised alpha VOC vrs non-VOC SARS-CoV-2 RBD

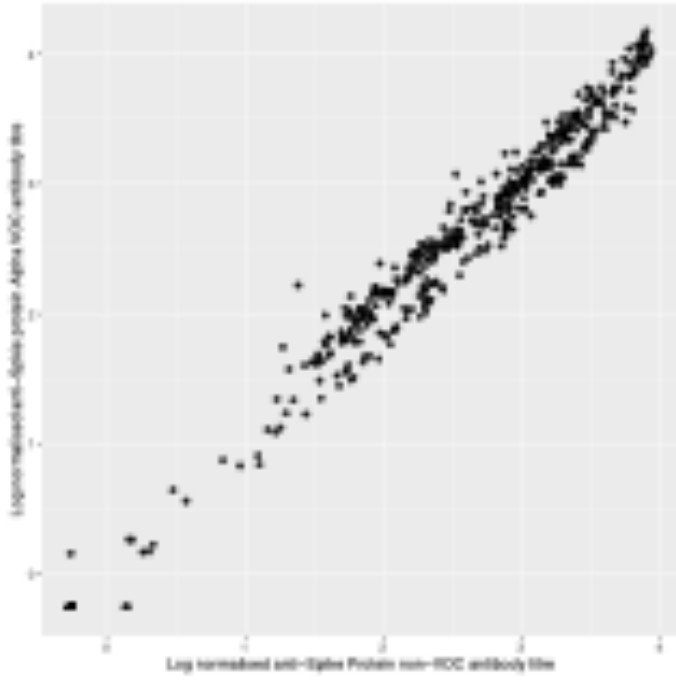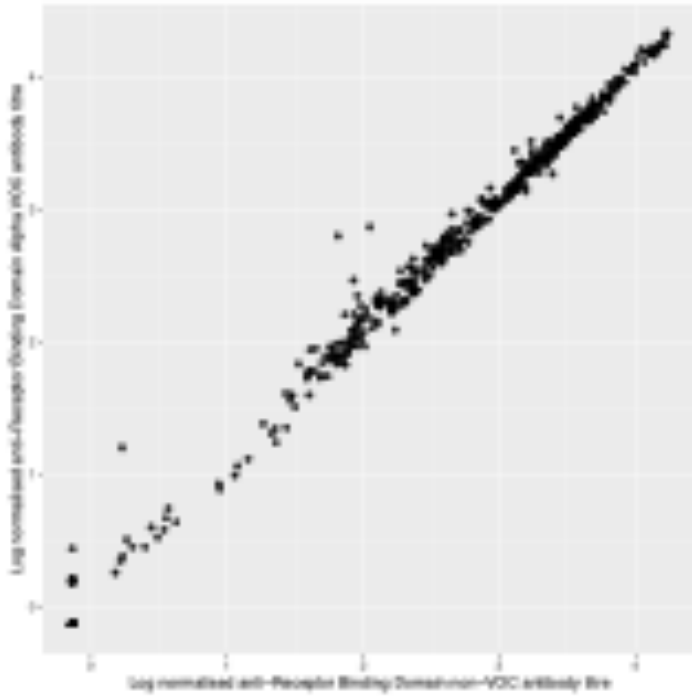

Supplement: pone.0284372.s002.pdf [file pone.0284372.s002.pdf]
